# Supplementary material for: Synthesis, Characterization, In Vitro Anticancer Potentiality, and Antimicrobial Activities of Novel Peptide–Glycyrrhetinic-Acid-Based Derivatives
Source: MDPI journal article supplement (doi:10.3390/molecules26154573), 2021-07-28
Supplement: s1 [file s1]

# Peak Find - Memory-159

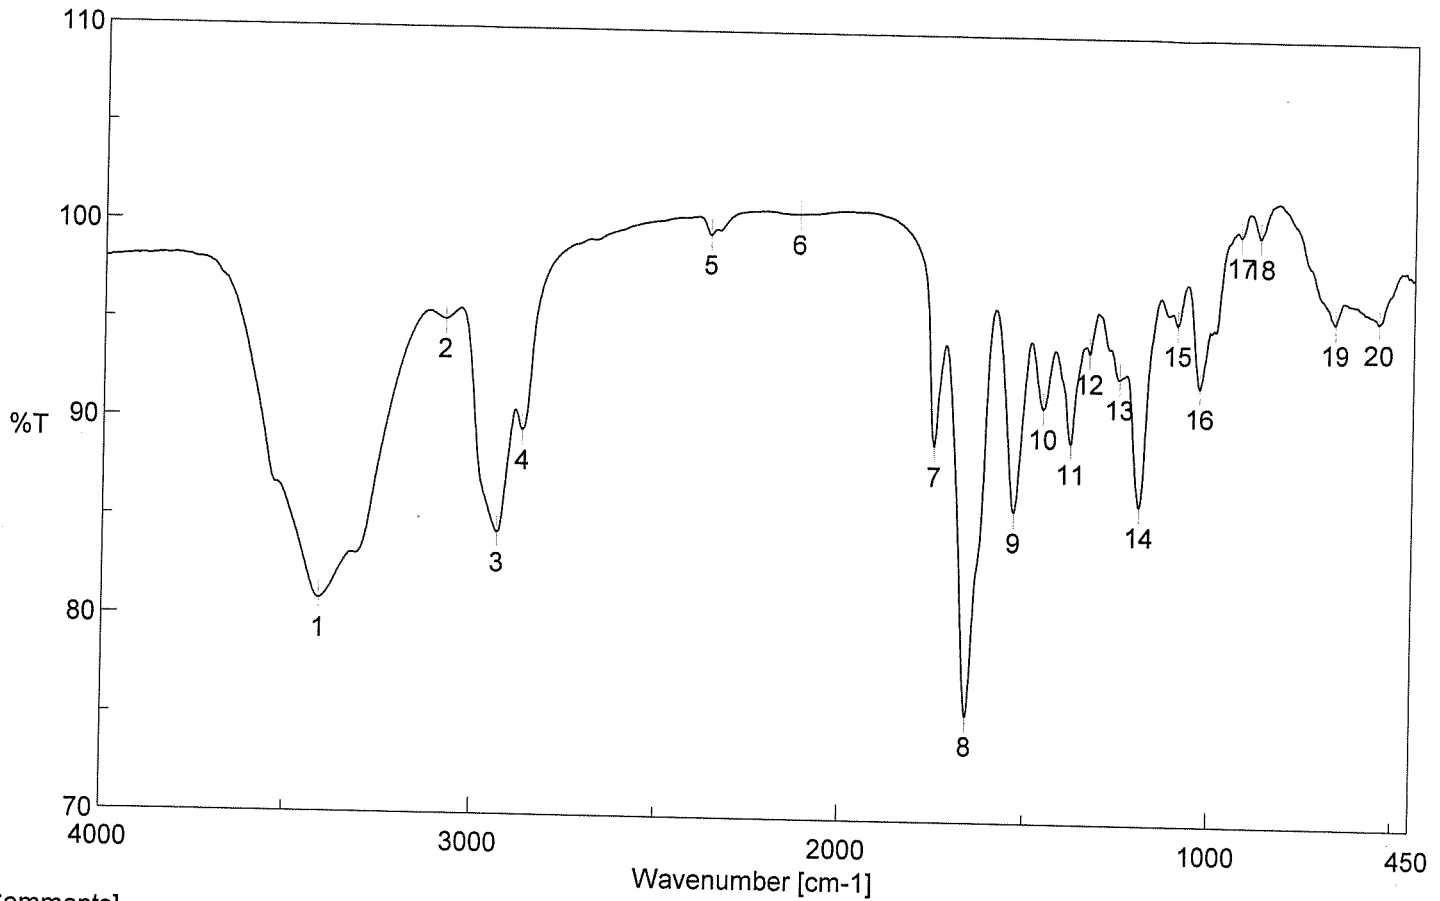

## [Comments]

Sample name SH-5 = 1  
 Comment 24/1/2017  
 User IR  
 Division R  
 Company MAC

## [ Result of Peak Picking ]

| No. | Position | Intensity | No.  | Position | Intensity | No.  | Position | Intensity |
|-----|----------|-----------|------|----------|-----------|------|----------|-----------|
| 1   | 3408.57  | 80.8431   | 2    | 3077.83  | 95.0902   | ✓ 3  | 2933.2   | 84.2776   |
| 4   | 2868.59  | 89.4869   | 5    | 2362.37  | 99.5843   | ✓ 6  | 2121.31  | 100.718   |
| ✓ 7 | 1752.01  | 89.0348   | ✓ 8  | 1659.45  | 75.4322   | ✓ 9  | 1535.06  | 85.7779   |
| 10  | 1457.92  | 91.052    | ✓ 11 | 1382.71  | 89.285    | ✓ 12 | 1334.5   | 93.9198   |
| 13  | 1252.54  | 92.6249   | 14   | 1195.65  | 86.168    | 15   | 1095.37  | 95.4245   |
| 16  | 1032.69  | 92.2318   | 17   | 924.7    | 99.9888   | 18   | 872.631  | 99.938    |
| 19  | 667.25   | 95.6271   | 20   | 547.685  | 95.6957   |      |          |           |

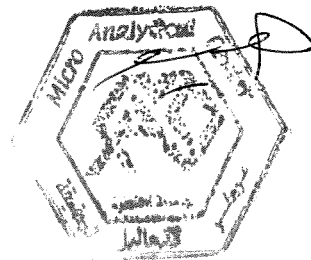

# Cairo University Micro Analytical Center

## DI Analysis Shimadzu Qp-2010 Plus

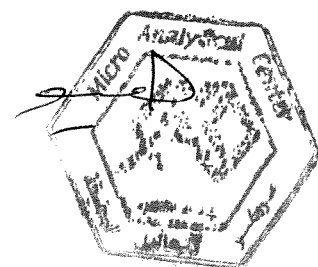

### Sample Information

Analyzed by : Dr. Mai Younis  
 Analyzed : 29/01/2017 11:30:49 ص  
 Sample Name : Sh-5 = 1  
 Sample ID :  
 Customer Name : Dr. Gaber Osman - NRC  
 Data File : C:\GCMSsolution\Data\Project1\Sh-5.QGD  
 Org Data File : C:\GCMSsolution\Data\Project1\Sh-5.QGD  
 Method File : C:\GCMSsolution\Data\Project1\High Temperature Op  
 Org Method File : C:\GCMSsolution\Data\Project1\High Temperature Op  
 Report File :  
 Tuning File : C:\GCMSsolution\System\Tune1\\_default.qgt  
 \$EndIf\$Modified by : Dr. Mai Younis  
 Modified : 29/01/2017 11:36:57 ص

### Method

==== Analytical Line 1 =====  
 IonSourceTemp :250.00 °C  
 [MS Table]  
 --Group 1 - Event 1--  
 Start Time :0.00min  
 End Time :10.00min  
 ACQ Mode :Scan  
 Event Time :0.50sec  
 Scan Speed :1428  
 Start m/z :50.00  
 End m/z :700.00

Electron Voltage : 70 eV  
 Ionization Mode : EI

C:\GCMSsolution\Data\Project1\Sh-5.QGD

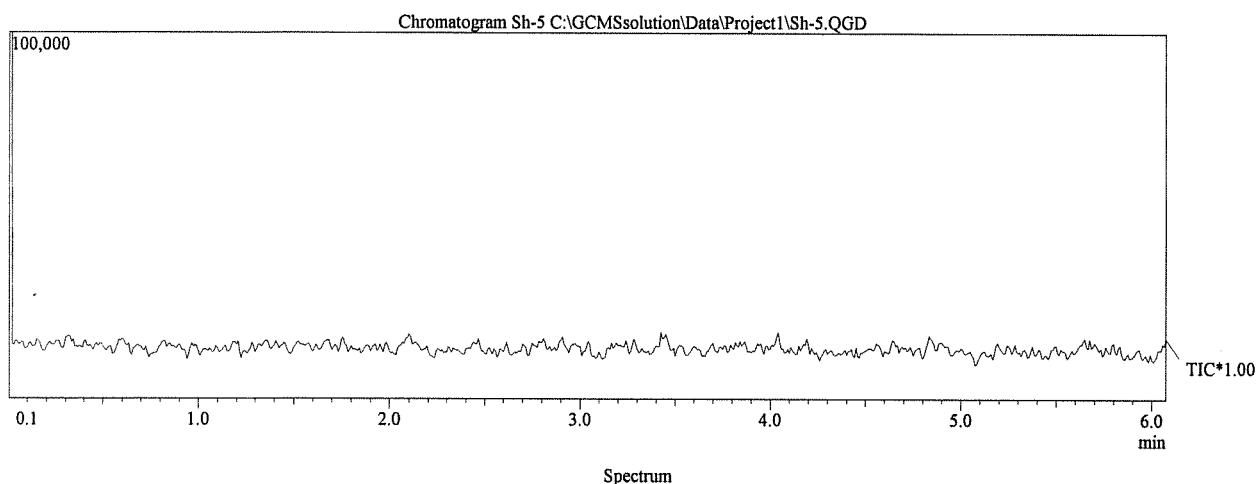

Line#:1 R.Time:3.5(Scan#:419)

MassPeaks:166

RawMode:Single 3.5(419) BasePeak:71(143)

BG Mode:None Group 1 - Event 1

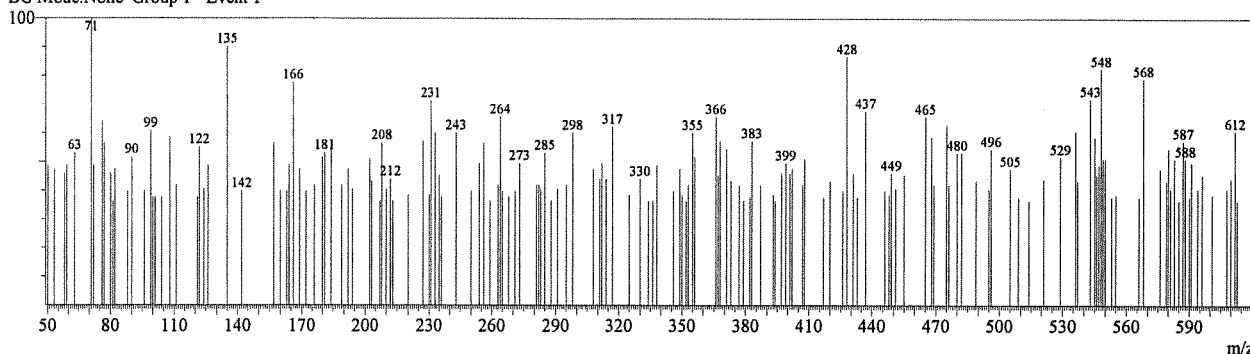

### Mass Table

Line#:1 R.Time:3.5(Scan#:419)

MassPeaks:166

RawMode:Single 3.5(419) BasePeak:71(143)

BG Mode:None Group 1 - Event 1

| # | m/z   | Abs. In | Rel. Int. | # | m/z   | Abs. In | Rel. Int. |
|---|-------|---------|-----------|---|-------|---------|-----------|
| 1 | 50.00 | 70      | 48.95     | 4 | 59.00 | 70      | 48.95     |
| 2 | 53.00 | 68      | 47.55     | 5 | 63.00 | 76      | 53.15     |
| 3 | 58.00 | 66      | 46.15     | 6 | 71.00 | 143     | 100.00    |
|   |       |         |           | 7 | 72.00 | 70      | 48.95     |
|   |       |         |           | 8 | 76.00 | 92      | 64.34     |
|   |       |         |           | 9 | 77.00 | 81      | 56.64     |

| #  | m/z    | Abs. In | Rel. Int. | #   | m/z    | Abs. In | Rel. Int. | #   | m/z    | Abs. In | Rel. Int. |
|----|--------|---------|-----------|-----|--------|---------|-----------|-----|--------|---------|-----------|
| 10 | 80.00  | 66      | 46.15     | 63  | 265.00 | 57      | 39.86     | 116 | 437.00 | 97      | 67.83     |
| 11 | 81.00  | 52      | 36.36     | 64  | 268.00 | 54      | 37.76     | 117 | 446.00 | 57      | 39.86     |
| 12 | 82.00  | 68      | 47.55     | 65  | 271.00 | 57      | 39.86     | 118 | 448.00 | 55      | 38.46     |
| 13 | 88.00  | 57      | 39.86     | 66  | 273.00 | 71      | 49.65     | 119 | 449.00 | 66      | 46.15     |
| 14 | 90.00  | 74      | 51.75     | 67  | 281.00 | 60      | 41.96     | 120 | 451.00 | 58      | 40.56     |
| 15 | 96.00  | 57      | 39.86     | 68  | 282.00 | 60      | 41.96     | 121 | 455.00 | 65      | 45.45     |
| 16 | 99.00  | 87      | 60.84     | 69  | 283.00 | 58      | 40.56     | 122 | 465.00 | 94      | 65.73     |
| 17 | 100.00 | 54      | 37.76     | 70  | 285.00 | 76      | 53.15     | 123 | 468.00 | 84      | 58.74     |
| 18 | 101.00 | 54      | 37.76     | 71  | 288.00 | 52      | 36.36     | 124 | 469.00 | 60      | 41.96     |
| 19 | 104.00 | 54      | 37.76     | 72  | 291.00 | 58      | 40.56     | 125 | 475.00 | 90      | 62.94     |
| 20 | 108.00 | 84      | 58.74     | 73  | 295.00 | 60      | 41.96     | 126 | 476.00 | 60      | 41.96     |
| 21 | 111.00 | 60      | 41.96     | 74  | 298.00 | 86      | 60.14     | 127 | 480.00 | 76      | 53.15     |
| 22 | 121.00 | 54      | 37.76     | 75  | 308.00 | 68      | 47.55     | 128 | 482.00 | 76      | 53.15     |
| 23 | 122.00 | 79      | 55.24     | 76  | 311.00 | 63      | 44.06     | 129 | 489.00 | 62      | 43.36     |
| 24 | 124.00 | 58      | 40.56     | 77  | 312.00 | 71      | 49.65     | 130 | 495.00 | 58      | 40.56     |
| 25 | 126.00 | 70      | 48.95     | 78  | 314.00 | 63      | 44.06     | 131 | 496.00 | 78      | 54.55     |
| 26 | 135.00 | 129     | 90.21     | 79  | 317.00 | 89      | 62.24     | 132 | 505.00 | 68      | 47.55     |
| 27 | 142.00 | 57      | 39.86     | 80  | 325.00 | 55      | 38.46     | 133 | 509.00 | 54      | 37.76     |
| 28 | 157.00 | 81      | 56.64     | 81  | 330.00 | 63      | 44.06     | 134 | 514.00 | 52      | 36.36     |
| 29 | 160.00 | 57      | 39.86     | 82  | 334.00 | 52      | 36.36     | 135 | 521.00 | 63      | 44.06     |
| 30 | 163.00 | 57      | 39.86     | 83  | 336.00 | 52      | 36.36     | 136 | 529.00 | 74      | 51.75     |
| 31 | 164.00 | 70      | 48.95     | 84  | 338.00 | 70      | 48.95     | 137 | 536.00 | 87      | 60.84     |
| 32 | 166.00 | 111     | 77.62     | 85  | 346.00 | 57      | 39.86     | 138 | 537.00 | 62      | 43.36     |
| 33 | 169.00 | 68      | 47.55     | 86  | 349.00 | 68      | 47.55     | 139 | 543.00 | 103     | 72.03     |
| 34 | 172.00 | 57      | 39.86     | 87  | 350.00 | 55      | 38.46     | 140 | 545.00 | 84      | 58.74     |
| 35 | 176.00 | 60      | 41.96     | 88  | 352.00 | 52      | 36.36     | 141 | 546.00 | 65      | 45.45     |
| 36 | 180.00 | 74      | 51.75     | 89  | 353.00 | 60      | 41.96     | 142 | 547.00 | 70      | 48.95     |
| 37 | 181.00 | 76      | 53.15     | 90  | 355.00 | 86      | 60.14     | 143 | 548.00 | 118     | 82.52     |
| 38 | 184.00 | 79      | 55.24     | 91  | 356.00 | 74      | 51.75     | 144 | 549.00 | 73      | 51.05     |
| 39 | 189.00 | 60      | 41.96     | 92  | 366.00 | 94      | 65.73     | 145 | 550.00 | 73      | 51.05     |
| 40 | 192.00 | 68      | 47.55     | 93  | 367.00 | 65      | 45.45     | 146 | 553.00 | 54      | 37.76     |
| 41 | 194.00 | 58      | 40.56     | 94  | 368.00 | 82      | 57.34     | 147 | 555.00 | 55      | 38.46     |
| 42 | 202.00 | 73      | 51.05     | 95  | 371.00 | 78      | 54.55     | 148 | 566.00 | 54      | 37.76     |
| 43 | 203.00 | 62      | 43.36     | 96  | 373.00 | 62      | 43.36     | 149 | 568.00 | 113     | 79.02     |
| 44 | 207.00 | 52      | 36.36     | 97  | 377.00 | 60      | 41.96     | 150 | 576.00 | 68      | 47.55     |
| 45 | 208.00 | 81      | 56.64     | 98  | 379.00 | 52      | 36.36     | 151 | 579.00 | 62      | 43.36     |
| 46 | 210.00 | 58      | 40.56     | 99  | 382.00 | 54      | 37.76     | 152 | 580.00 | 78      | 54.55     |
| 47 | 212.00 | 63      | 44.06     | 100 | 383.00 | 82      | 57.34     | 153 | 581.00 | 58      | 40.56     |
| 48 | 213.00 | 52      | 36.36     | 101 | 387.00 | 60      | 41.96     | 154 | 583.00 | 73      | 51.05     |
| 49 | 220.00 | 55      | 38.46     | 102 | 393.00 | 55      | 38.46     | 155 | 585.00 | 52      | 36.36     |
| 50 | 227.00 | 82      | 57.34     | 103 | 394.00 | 52      | 36.36     | 156 | 587.00 | 82      | 57.34     |
| 51 | 230.00 | 55      | 38.46     | 104 | 397.00 | 66      | 46.15     | 157 | 588.00 | 73      | 51.05     |
| 52 | 231.00 | 102     | 71.33     | 105 | 399.00 | 71      | 49.65     | 158 | 590.00 | 54      | 37.76     |
| 53 | 233.00 | 86      | 60.14     | 106 | 401.00 | 66      | 46.15     | 159 | 591.00 | 71      | 49.65     |
| 54 | 235.00 | 65      | 45.45     | 107 | 402.00 | 68      | 47.55     | 160 | 594.00 | 58      | 40.56     |
| 55 | 236.00 | 54      | 37.76     | 108 | 407.00 | 60      | 41.96     | 161 | 596.00 | 65      | 45.45     |
| 56 | 243.00 | 86      | 60.14     | 109 | 408.00 | 73      | 51.05     | 162 | 601.00 | 55      | 38.46     |
| 57 | 250.00 | 57      | 39.86     | 110 | 417.00 | 54      | 37.76     | 163 | 608.00 | 58      | 40.56     |
| 58 | 254.00 | 71      | 49.65     | 111 | 420.00 | 62      | 43.36     | 164 | 610.00 | 63      | 44.06     |
| 59 | 256.00 | 81      | 56.64     | 112 | 426.00 | 57      | 39.86     | 165 | 612.00 | 87      | 60.84     |
| 60 | 259.00 | 52      | 36.36     | 113 | 428.00 | 124     | 86.71     | 166 | 613.00 | 52      | 36.36     |
| 61 | 263.00 | 60      | 41.96     | 114 | 431.00 | 66      | 46.15     |     |        |         |           |
| 62 | 264.00 | 94      | 65.73     | 115 | 433.00 | 54      | 37.76     |     |        |         |           |

# Peak Find - Memory-182

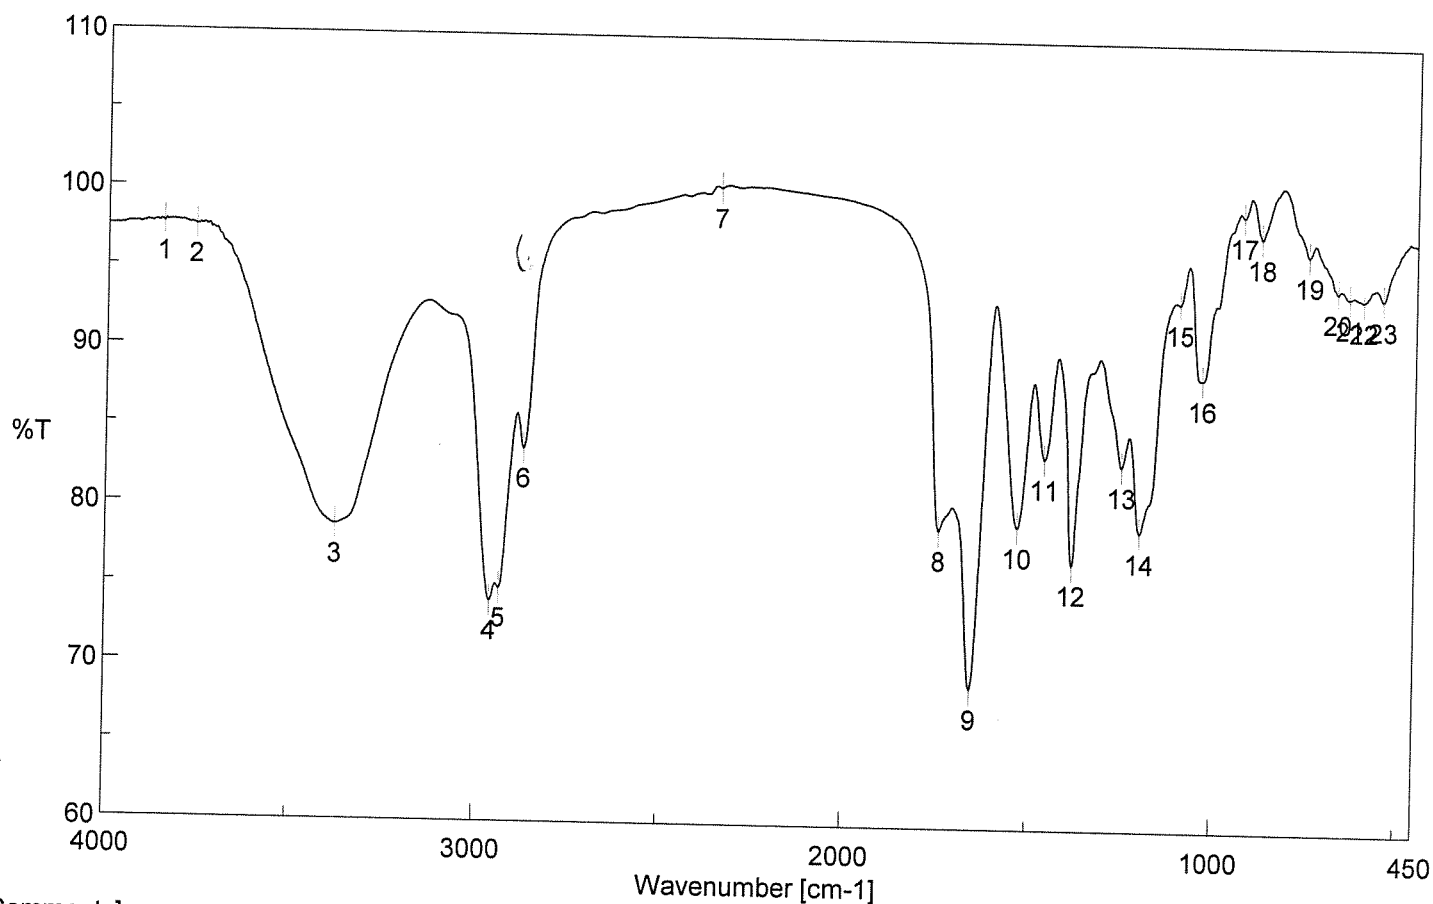

## [Comments]

Sample name SH-1 = 2  
 Comment 24/1/2017  
 User IR  
 Division IR  
 Company MAC

## [ Result of Peak Picking ]

| No. | Position | Intensity |
|-----|----------|-----------|
| 1   | 3848.26  | 97.6517   |
| 4   | 2959.23  | 73.9579   |
| 7   | 2340.19  | 100.323   |
| 10  | 1530.24  | 79.1259   |
| 13  | 1250.61  | 83.0517   |
| 16  | 1031.73  | 88.635    |
| 19  | 746.317  | 96.6093   |
| 22  | 594.932  | 93.8247   |

| No. | Position | Intensity |
|-----|----------|-----------|
| 2   | 3759.55  | 97.5053   |
| 5   | 2934.16  | 74.7764   |
| 8   | 1743.33  | 78.8584   |
| 11  | 1458.89  | 83.4826   |
| 14  | 1200.47  | 78.9007   |
| 17  | 923.736  | 99.061    |
| 20  | 668.214  | 94.333    |
| 23  | 542.863  | 93.9123   |

| No. | Position | Intensity |
|-----|----------|-----------|
| 3   | 3375.78  | 78.6706   |
| 6   | 2870.52  | 83.5995   |
| 9   | 1655.59  | 68.8535   |
| 12  | 1383.68  | 76.8402   |
| 15  | 1096.33  | 93.43     |
| 18  | 874.56   | 97.6974   |
| 21  | 634.466  | 93.993    |

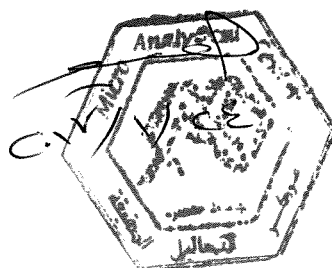

# Cairo University Micro Analytical Center

## DI Analysis Shimadzu Qp-2010 Plus

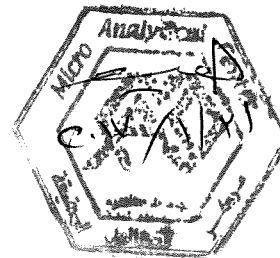

### Sample Information

Analyzed by : Dr. Mai Younis  
 Analyzed : 29/01/2017 10:21:33 ص  
 Sample Name : Sh-1 = 2  
 Sample ID :  
 Customer Name : Dr. Gaber Osman - NRC  
 Data File : C:\GCMSsolution\Data\Project1\Sh-1.QGD  
 Org Data File : C:\GCMSsolution\Data\Project1\Sh-1.QGD  
 Method File : C:\GCMSsolution\Data\Project1\High Temperature Op  
 Org Method File : C:\GCMSsolution\Data\Project1\High Temperature Op  
 Report File :  
 Tuning File : C:\GCMSsolution\System\Tune1\\_default.qgt  
 \$EndIf\$Modified by : Dr. Mai Younis  
 Modified : 29/01/2017 10:26:55 ص

### Method

==== Analytical Line 1 ====  
 IonSourceTemp : 250.00 °C  
 [MS Table]  
 --Group 1 - Event 1--  
 Start Time : 0.00min  
 End Time : 10.00min  
 ACQ Mode : Scan  
 Event Time : 0.50sec  
 Scan Speed : 2500  
 Start m/z : 50.00  
 End m/z : 1090.00

Electron Voltage : 70 eV  
 Ionization Mode : EI

C:\GCMSsolution\Data\Project1\Sh-1.QGD

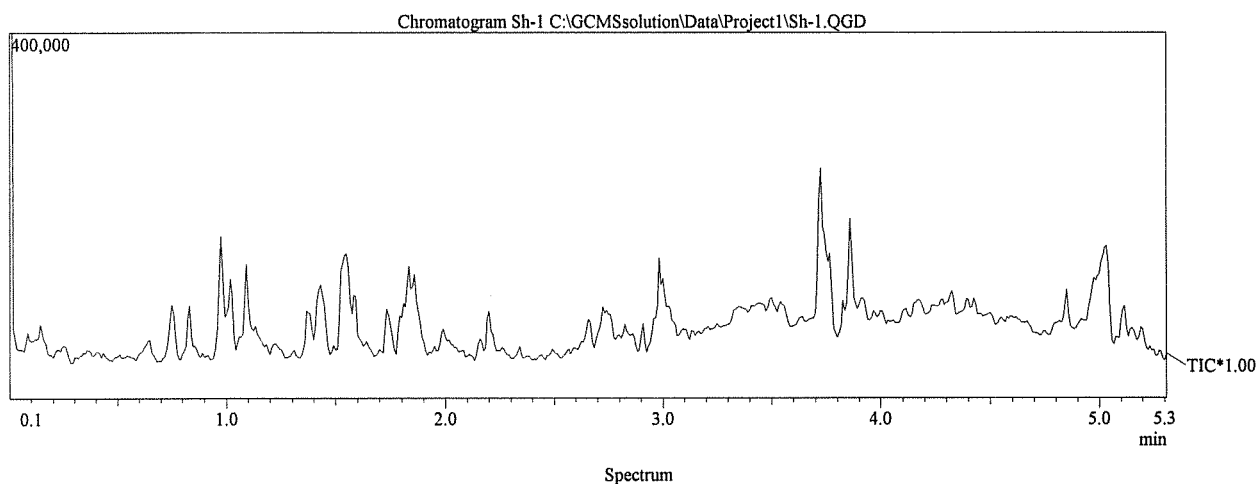

Line#:1 R.Time:4.3(Scan#:512)  
 MassPeaks:442  
 RawMode:Single 4.3(512) BasePeak:613(13053)  
 BG Mode:None Group 1 - Event 1

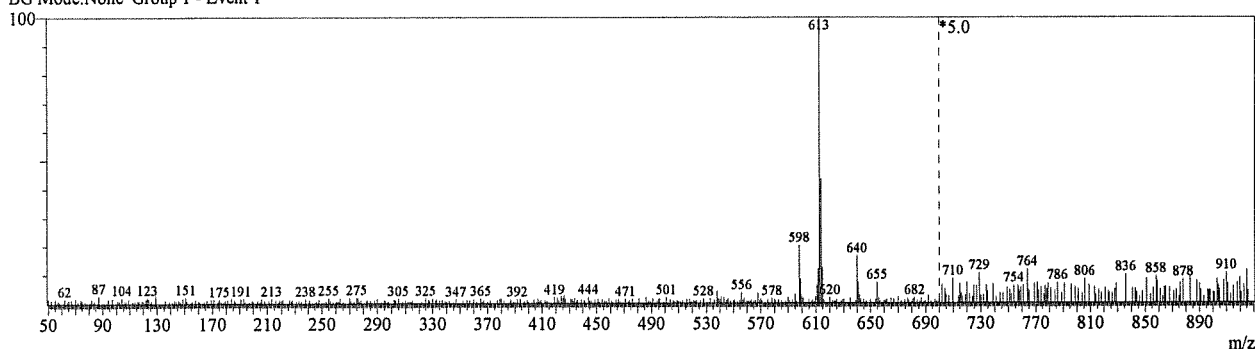

### Mass Table

Line#:1 R.Time:4.3(Scan#:512)  
 MassPeaks:442  
 RawMode:Single 4.3(512) BasePeak:613(13053)  
 BG Mode:None Group 1 - Event 1

| # | m/z   | Abs. In | Rel. Int. | # | m/z   | Abs. In | Rel. Int. |
|---|-------|---------|-----------|---|-------|---------|-----------|
| 1 | 50.00 | 188     | 1.44      | 4 | 57.00 | 102     | 0.78      |
| 2 | 52.00 | 140     | 1.07      | 5 | 58.00 | 52      | 0.40      |
| 3 | 55.00 | 169     | 1.29      | 6 | 62.00 | 209     | 1.60      |
|   |       |         |           | 7 | 64.00 | 92      | 0.70      |
|   |       |         |           | 8 | 65.00 | 158     | 1.21      |
|   |       |         |           | 9 | 67.00 | 161     | 1.23      |

| #  | m/z    | Abs. In | Rel. Int. | #   | m/z    | Abs. In | Rel. Int. | #   | m/z    | Abs. In | Rel. Int. |
|----|--------|---------|-----------|-----|--------|---------|-----------|-----|--------|---------|-----------|
| 10 | 70.00  | 212     | 1.62      | 79  | 206.00 | 201     | 1.54      | 148 | 355.00 | 148     | 1.13      |
| 11 | 72.00  | 98      | 0.75      | 80  | 208.00 | 108     | 0.83      | 149 | 357.00 | 126     | 0.97      |
| 12 | 74.00  | 167     | 1.28      | 81  | 211.00 | 124     | 0.95      | 150 | 360.00 | 162     | 1.24      |
| 13 | 75.00  | 140     | 1.07      | 82  | 213.00 | 204     | 1.56      | 151 | 362.00 | 68      | 0.52      |
| 14 | 77.00  | 94      | 0.72      | 83  | 216.00 | 132     | 1.01      | 152 | 365.00 | 206     | 1.58      |
| 15 | 80.00  | 62      | 0.47      | 84  | 218.00 | 68      | 0.52      | 153 | 366.00 | 71      | 0.54      |
| 16 | 81.00  | 62      | 0.47      | 85  | 219.00 | 151     | 1.16      | 154 | 367.00 | 126     | 0.97      |
| 17 | 82.00  | 191     | 1.46      | 86  | 220.00 | 100     | 0.77      | 155 | 370.00 | 95      | 0.73      |
| 18 | 83.00  | 57      | 0.44      | 87  | 221.00 | 166     | 1.27      | 156 | 372.00 | 111     | 0.85      |
| 19 | 84.00  | 106     | 0.81      | 88  | 226.00 | 164     | 1.26      | 157 | 377.00 | 135     | 1.03      |
| 20 | 87.00  | 354     | 2.71      | 89  | 227.00 | 81      | 0.62      | 158 | 379.00 | 207     | 1.59      |
| 21 | 94.00  | 186     | 1.42      | 90  | 228.00 | 143     | 1.10      | 159 | 380.00 | 185     | 1.42      |
| 22 | 97.00  | 214     | 1.64      | 91  | 231.00 | 94      | 0.72      | 160 | 382.00 | 121     | 0.93      |
| 23 | 101.00 | 129     | 0.99      | 92  | 233.00 | 106     | 0.81      | 161 | 387.00 | 153     | 1.17      |
| 24 | 102.00 | 97      | 0.74      | 93  | 235.00 | 92      | 0.70      | 162 | 389.00 | 54      | 0.41      |
| 25 | 104.00 | 263     | 2.01      | 94  | 238.00 | 193     | 1.48      | 163 | 390.00 | 58      | 0.44      |
| 26 | 106.00 | 106     | 0.81      | 95  | 241.00 | 126     | 0.97      | 164 | 392.00 | 182     | 1.39      |
| 27 | 107.00 | 98      | 0.75      | 96  | 246.00 | 89      | 0.68      | 165 | 394.00 | 182     | 1.39      |
| 28 | 109.00 | 186     | 1.42      | 97  | 248.00 | 159     | 1.22      | 166 | 397.00 | 73      | 0.56      |
| 29 | 112.00 | 84      | 0.64      | 98  | 253.00 | 71      | 0.54      | 167 | 399.00 | 146     | 1.12      |
| 30 | 114.00 | 82      | 0.63      | 99  | 255.00 | 241     | 1.85      | 168 | 400.00 | 54      | 0.41      |
| 31 | 116.00 | 121     | 0.93      | 100 | 256.00 | 116     | 0.89      | 169 | 404.00 | 162     | 1.24      |
| 32 | 117.00 | 118     | 0.90      | 101 | 258.00 | 78      | 0.60      | 170 | 406.00 | 55      | 0.42      |
| 33 | 119.00 | 122     | 0.93      | 102 | 260.00 | 57      | 0.44      | 171 | 407.00 | 204     | 1.56      |
| 34 | 120.00 | 103     | 0.79      | 103 | 261.00 | 95      | 0.73      | 172 | 408.00 | 79      | 0.61      |
| 35 | 121.00 | 74      | 0.57      | 104 | 262.00 | 81      | 0.62      | 173 | 409.00 | 135     | 1.03      |
| 36 | 122.00 | 175     | 1.34      | 105 | 263.00 | 222     | 1.70      | 174 | 412.00 | 145     | 1.11      |
| 37 | 123.00 | 262     | 2.01      | 106 | 265.00 | 57      | 0.44      | 175 | 413.00 | 71      | 0.54      |
| 38 | 124.00 | 220     | 1.69      | 107 | 270.00 | 262     | 2.01      | 176 | 414.00 | 71      | 0.54      |
| 39 | 125.00 | 62      | 0.47      | 108 | 271.00 | 105     | 0.80      | 177 | 419.00 | 271     | 2.08      |
| 40 | 126.00 | 114     | 0.87      | 109 | 273.00 | 78      | 0.60      | 178 | 421.00 | 231     | 1.77      |
| 41 | 129.00 | 361     | 2.77      | 110 | 275.00 | 263     | 2.01      | 179 | 422.00 | 114     | 0.87      |
| 42 | 136.00 | 146     | 1.12      | 111 | 276.00 | 230     | 1.76      | 180 | 424.00 | 316     | 2.42      |
| 43 | 139.00 | 68      | 0.52      | 112 | 277.00 | 94      | 0.72      | 181 | 425.00 | 239     | 1.83      |
| 44 | 141.00 | 74      | 0.57      | 113 | 278.00 | 134     | 1.03      | 182 | 426.00 | 350     | 2.68      |
| 45 | 143.00 | 129     | 0.99      | 114 | 282.00 | 118     | 0.90      | 183 | 427.00 | 202     | 1.55      |
| 46 | 144.00 | 97      | 0.74      | 115 | 283.00 | 153     | 1.17      | 184 | 431.00 | 193     | 1.48      |
| 47 | 146.00 | 130     | 1.00      | 116 | 285.00 | 116     | 0.89      | 185 | 432.00 | 170     | 1.30      |
| 48 | 147.00 | 79      | 0.61      | 117 | 288.00 | 111     | 0.85      | 186 | 433.00 | 102     | 0.78      |
| 49 | 149.00 | 209     | 1.60      | 118 | 290.00 | 222     | 1.70      | 187 | 434.00 | 198     | 1.52      |
| 50 | 151.00 | 273     | 2.09      | 119 | 293.00 | 54      | 0.41      | 188 | 435.00 | 68      | 0.52      |
| 51 | 152.00 | 106     | 0.81      | 120 | 295.00 | 148     | 1.13      | 189 | 436.00 | 129     | 0.99      |
| 52 | 155.00 | 57      | 0.44      | 121 | 296.00 | 121     | 0.93      | 190 | 439.00 | 146     | 1.12      |
| 53 | 156.00 | 108     | 0.83      | 122 | 297.00 | 55      | 0.42      | 191 | 441.00 | 122     | 0.93      |
| 54 | 158.00 | 145     | 1.11      | 123 | 298.00 | 74      | 0.57      | 192 | 444.00 | 282     | 2.16      |
| 55 | 160.00 | 95      | 0.73      | 124 | 302.00 | 175     | 1.34      | 193 | 445.00 | 119     | 0.91      |
| 56 | 161.00 | 71      | 0.54      | 125 | 303.00 | 142     | 1.09      | 194 | 446.00 | 103     | 0.79      |
| 57 | 164.00 | 90      | 0.69      | 126 | 305.00 | 206     | 1.58      | 195 | 449.00 | 146     | 1.12      |
| 58 | 166.00 | 145     | 1.11      | 127 | 308.00 | 66      | 0.51      | 196 | 451.00 | 180     | 1.38      |
| 59 | 169.00 | 158     | 1.21      | 128 | 310.00 | 119     | 0.91      | 197 | 452.00 | 73      | 0.56      |
| 60 | 171.00 | 169     | 1.29      | 129 | 312.00 | 70      | 0.54      | 198 | 454.00 | 167     | 1.28      |
| 61 | 174.00 | 68      | 0.52      | 130 | 313.00 | 76      | 0.58      | 199 | 456.00 | 98      | 0.75      |
| 62 | 175.00 | 175     | 1.34      | 131 | 314.00 | 52      | 0.40      | 200 | 457.00 | 105     | 0.80      |
| 63 | 176.00 | 89      | 0.68      | 132 | 315.00 | 130     | 1.00      | 201 | 459.00 | 201     | 1.54      |
| 64 | 178.00 | 70      | 0.54      | 133 | 322.00 | 81      | 0.62      | 202 | 461.00 | 90      | 0.69      |
| 65 | 179.00 | 114     | 0.87      | 134 | 325.00 | 217     | 1.66      | 203 | 464.00 | 150     | 1.15      |
| 66 | 181.00 | 164     | 1.26      | 135 | 327.00 | 153     | 1.17      | 204 | 466.00 | 175     | 1.34      |
| 67 | 184.00 | 204     | 1.56      | 136 | 328.00 | 89      | 0.68      | 205 | 467.00 | 70      | 0.54      |
| 68 | 186.00 | 146     | 1.12      | 137 | 330.00 | 201     | 1.54      | 206 | 471.00 | 183     | 1.40      |
| 69 | 187.00 | 79      | 0.61      | 138 | 332.00 | 127     | 0.97      | 207 | 473.00 | 74      | 0.57      |
| 70 | 191.00 | 206     | 1.58      | 139 | 333.00 | 169     | 1.29      | 208 | 474.00 | 124     | 0.95      |
| 71 | 193.00 | 201     | 1.54      | 140 | 335.00 | 113     | 0.87      | 209 | 476.00 | 210     | 1.61      |
| 72 | 194.00 | 52      | 0.40      | 141 | 337.00 | 148     | 1.13      | 210 | 481.00 | 223     | 1.71      |
| 73 | 197.00 | 68      | 0.52      | 142 | 339.00 | 81      | 0.62      | 211 | 486.00 | 242     | 1.85      |
| 74 | 199.00 | 118     | 0.90      | 143 | 340.00 | 74      | 0.57      | 212 | 488.00 | 97      | 0.74      |
| 75 | 200.00 | 105     | 0.80      | 144 | 342.00 | 105     | 0.80      | 213 | 489.00 | 82      | 0.63      |
| 76 | 203.00 | 110     | 0.84      | 145 | 345.00 | 60      | 0.46      | 214 | 491.00 | 199     | 1.52      |
| 77 | 204.00 | 62      | 0.47      | 146 | 347.00 | 170     | 1.30      | 215 | 494.00 | 106     | 0.81      |
| 78 | 205.00 | 55      | 0.42      | 147 | 352.00 | 110     | 0.84      | 216 | 495.00 | 190     | 1.46      |

| #   | m/z    | Abs. In | Rel. Int. | #   | m/z    | Abs. In | Rel. Int. | #   | m/z    | Abs. In | Rel. Int. |
|-----|--------|---------|-----------|-----|--------|---------|-----------|-----|--------|---------|-----------|
| 217 | 496.00 | 206     | 1.58      | 286 | 612.05 | 1560    | 11.95     | 355 | 738.90 | 170     | 1.30      |
| 218 | 499.00 | 62      | 0.47      | 287 | 612.95 | 13053   | 100.00    | 356 | 740.90 | 54      | 0.41      |
| 219 | 501.00 | 242     | 1.85      | 288 | 613.95 | 5674    | 43.47     | 357 | 743.90 | 92      | 0.70      |
| 220 | 504.00 | 164     | 1.26      | 289 | 615.00 | 1606    | 12.30     | 358 | 745.90 | 87      | 0.67      |
| 221 | 506.00 | 121     | 0.93      | 290 | 616.00 | 142     | 1.09      | 359 | 748.90 | 138     | 1.06      |
| 222 | 507.00 | 71      | 0.54      | 291 | 620.00 | 233     | 1.79      | 360 | 750.90 | 118     | 0.90      |
| 223 | 508.00 | 55      | 0.42      | 292 | 622.00 | 95      | 0.73      | 361 | 751.90 | 76      | 0.58      |
| 224 | 509.00 | 121     | 0.93      | 293 | 623.00 | 81      | 0.62      | 362 | 753.90 | 159     | 1.22      |
| 225 | 510.00 | 90      | 0.69      | 294 | 624.00 | 76      | 0.58      | 363 | 756.90 | 154     | 1.18      |
| 226 | 511.00 | 81      | 0.62      | 295 | 625.00 | 150     | 1.15      | 364 | 757.90 | 113     | 0.87      |
| 227 | 513.00 | 98      | 0.75      | 296 | 628.00 | 79      | 0.61      | 365 | 758.90 | 140     | 1.07      |
| 228 | 516.00 | 178     | 1.36      | 297 | 629.00 | 113     | 0.87      | 366 | 760.90 | 161     | 1.23      |
| 229 | 518.00 | 166     | 1.27      | 298 | 630.00 | 166     | 1.27      | 367 | 763.90 | 305     | 2.34      |
| 230 | 519.00 | 79      | 0.61      | 299 | 635.00 | 218     | 1.67      | 368 | 764.90 | 114     | 0.87      |
| 231 | 520.00 | 52      | 0.40      | 300 | 639.00 | 102     | 0.78      | 369 | 768.90 | 175     | 1.34      |
| 232 | 521.00 | 124     | 0.95      | 301 | 640.00 | 2143    | 16.42     | 370 | 770.90 | 182     | 1.39      |
| 233 | 522.00 | 82      | 0.63      | 302 | 640.90 | 930     | 7.12      | 371 | 771.90 | 110     | 0.84      |
| 234 | 523.00 | 135     | 1.03      | 303 | 641.90 | 351     | 2.69      | 372 | 773.90 | 145     | 1.11      |
| 235 | 526.00 | 98      | 0.75      | 304 | 642.90 | 161     | 1.23      | 373 | 775.90 | 79      | 0.61      |
| 236 | 528.00 | 190     | 1.46      | 305 | 644.90 | 158     | 1.21      | 374 | 776.90 | 151     | 1.16      |
| 237 | 533.00 | 185     | 1.42      | 306 | 646.90 | 81      | 0.62      | 375 | 777.90 | 130     | 1.00      |
| 238 | 536.00 | 138     | 1.06      | 307 | 649.90 | 135     | 1.03      | 376 | 778.90 | 175     | 1.34      |
| 239 | 538.00 | 546     | 4.18      | 308 | 653.90 | 145     | 1.11      | 377 | 780.90 | 129     | 0.99      |
| 240 | 539.00 | 210     | 1.61      | 309 | 654.95 | 937     | 7.18      | 378 | 783.90 | 114     | 0.87      |
| 241 | 540.00 | 154     | 1.18      | 310 | 655.90 | 218     | 1.67      | 379 | 785.90 | 183     | 1.40      |
| 242 | 541.00 | 282     | 2.16      | 311 | 656.90 | 90      | 0.69      | 380 | 788.90 | 87      | 0.67      |
| 243 | 543.00 | 234     | 1.79      | 312 | 659.90 | 81      | 0.62      | 381 | 790.90 | 172     | 1.32      |
| 244 | 545.00 | 127     | 0.97      | 313 | 660.90 | 113     | 0.87      | 382 | 795.90 | 166     | 1.27      |
| 245 | 546.00 | 194     | 1.49      | 314 | 661.90 | 150     | 1.15      | 383 | 798.90 | 145     | 1.11      |
| 246 | 548.00 | 79      | 0.61      | 315 | 664.90 | 202     | 1.55      | 384 | 800.90 | 126     | 0.97      |
| 247 | 550.00 | 106     | 0.81      | 316 | 666.90 | 164     | 1.26      | 385 | 803.90 | 84      | 0.64      |
| 248 | 551.00 | 119     | 0.91      | 317 | 669.90 | 265     | 2.03      | 386 | 805.90 | 217     | 1.66      |
| 249 | 553.00 | 57      | 0.44      | 318 | 671.90 | 87      | 0.67      | 387 | 808.90 | 161     | 1.23      |
| 250 | 555.00 | 132     | 1.01      | 319 | 674.90 | 114     | 0.87      | 388 | 812.90 | 143     | 1.10      |
| 251 | 556.00 | 463     | 3.55      | 320 | 676.90 | 193     | 1.48      | 389 | 813.90 | 71      | 0.54      |
| 252 | 557.00 | 151     | 1.16      | 321 | 677.90 | 73      | 0.56      | 390 | 815.90 | 113     | 0.87      |
| 253 | 558.00 | 225     | 1.72      | 322 | 679.90 | 74      | 0.57      | 391 | 817.90 | 90      | 0.69      |
| 254 | 560.00 | 78      | 0.60      | 323 | 680.90 | 169     | 1.29      | 392 | 820.90 | 135     | 1.03      |
| 255 | 561.00 | 87      | 0.67      | 324 | 681.90 | 231     | 1.77      | 393 | 822.90 | 105     | 0.80      |
| 256 | 562.00 | 79      | 0.61      | 325 | 683.90 | 102     | 0.78      | 394 | 823.90 | 92      | 0.70      |
| 257 | 563.00 | 116     | 0.89      | 326 | 685.90 | 54      | 0.41      | 395 | 825.90 | 95      | 0.73      |
| 258 | 565.00 | 89      | 0.68      | 327 | 686.90 | 202     | 1.55      | 396 | 827.90 | 122     | 0.93      |
| 259 | 566.00 | 113     | 0.87      | 328 | 688.90 | 65      | 0.50      | 397 | 828.90 | 174     | 1.33      |
| 260 | 568.00 | 449     | 3.44      | 329 | 689.90 | 71      | 0.54      | 398 | 835.90 | 258     | 1.98      |
| 261 | 569.00 | 119     | 0.91      | 330 | 691.90 | 334     | 2.56      | 399 | 840.90 | 129     | 0.99      |
| 262 | 570.00 | 177     | 1.36      | 331 | 693.90 | 55      | 0.42      | 400 | 842.90 | 130     | 1.00      |
| 263 | 571.00 | 103     | 0.79      | 332 | 696.90 | 110     | 0.84      | 401 | 843.90 | 98      | 0.75      |
| 264 | 575.00 | 142     | 1.09      | 333 | 697.90 | 70      | 0.54      | 402 | 845.90 | 57      | 0.44      |
| 265 | 578.00 | 198     | 1.52      | 334 | 699.90 | 89      | 0.68      | 403 | 847.90 | 103     | 0.79      |
| 266 | 580.00 | 174     | 1.33      | 335 | 701.90 | 164     | 1.26      | 404 | 850.90 | 222     | 1.70      |
| 267 | 581.00 | 106     | 0.81      | 336 | 703.90 | 129     | 0.99      | 405 | 853.90 | 73      | 0.56      |
| 268 | 583.00 | 140     | 1.07      | 337 | 704.90 | 73      | 0.56      | 406 | 855.90 | 132     | 1.01      |
| 269 | 585.00 | 103     | 0.79      | 338 | 706.90 | 58      | 0.44      | 407 | 857.90 | 239     | 1.83      |
| 270 | 588.00 | 71      | 0.54      | 339 | 709.90 | 223     | 1.71      | 408 | 858.90 | 196     | 1.50      |
| 271 | 590.00 | 244     | 1.87      | 340 | 713.90 | 58      | 0.44      | 409 | 860.90 | 122     | 0.93      |
| 272 | 591.00 | 124     | 0.95      | 341 | 714.90 | 177     | 1.36      | 410 | 862.90 | 57      | 0.44      |
| 273 | 593.00 | 114     | 0.87      | 342 | 715.90 | 86      | 0.66      | 411 | 863.90 | 142     | 1.09      |
| 274 | 595.00 | 410     | 3.14      | 343 | 716.90 | 57      | 0.44      | 412 | 864.90 | 143     | 1.10      |
| 275 | 596.00 | 76      | 0.58      | 344 | 718.90 | 74      | 0.57      | 413 | 867.90 | 137     | 1.05      |
| 276 | 597.95 | 2640    | 20.23     | 345 | 719.90 | 188     | 1.44      | 414 | 870.90 | 106     | 0.81      |
| 277 | 598.90 | 1106    | 8.47      | 346 | 721.90 | 76      | 0.58      | 415 | 872.90 | 121     | 0.93      |
| 278 | 599.90 | 297     | 2.28      | 347 | 723.90 | 55      | 0.42      | 416 | 874.90 | 55      | 0.42      |
| 279 | 600.90 | 207     | 1.59      | 348 | 724.90 | 156     | 1.20      | 417 | 875.90 | 178     | 1.36      |
| 280 | 604.90 | 148     | 1.13      | 349 | 726.90 | 154     | 1.18      | 418 | 877.90 | 212     | 1.62      |
| 281 | 606.90 | 74      | 0.57      | 350 | 728.90 | 273     | 2.09      | 419 | 882.90 | 234     | 1.79      |
| 282 | 607.90 | 110     | 0.84      | 351 | 729.90 | 71      | 0.54      | 420 | 887.90 | 198     | 1.52      |
| 283 | 608.90 | 58      | 0.44      | 352 | 731.90 | 74      | 0.57      | 421 | 889.90 | 172     | 1.32      |
| 284 | 609.90 | 279     | 2.14      | 353 | 733.90 | 161     | 1.23      | 422 | 890.90 | 118     | 0.90      |
| 285 | 610.95 | 804     | 6.16      | 354 | 734.90 | 105     | 0.80      | 423 | 892.90 | 55      | 0.42      |

| #   | m/z    | Abs. In | Rel. Int. | #   | m/z    | Abs. In | Rel. Int. | #   | m/z    | Abs. In | Rel. Int. |
|-----|--------|---------|-----------|-----|--------|---------|-----------|-----|--------|---------|-----------|
| 424 | 895.90 | 118     | 0.90      | 431 | 904.90 | 121     | 0.93      | 438 | 919.90 | 228     | 1.75      |
| 425 | 896.90 | 110     | 0.84      | 432 | 907.90 | 201     | 1.54      | 439 | 920.90 | 95      | 0.73      |
| 426 | 897.90 | 116     | 0.89      | 433 | 909.90 | 273     | 2.09      | 440 | 922.90 | 161     | 1.23      |
| 427 | 899.90 | 100     | 0.77      | 434 | 910.90 | 177     | 1.36      | 441 | 924.90 | 300     | 2.30      |
| 428 | 900.90 | 87      | 0.67      | 435 | 912.90 | 79      | 0.61      | 442 | 925.90 | 111     | 0.85      |
| 429 | 902.90 | 215     | 1.65      | 436 | 914.90 | 153     | 1.17      |     |        |         |           |
| 430 | 903.90 | 158     | 1.21      | 437 | 917.90 | 185     | 1.42      |     |        |         |           |

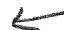



# Peak Find - Memory-162

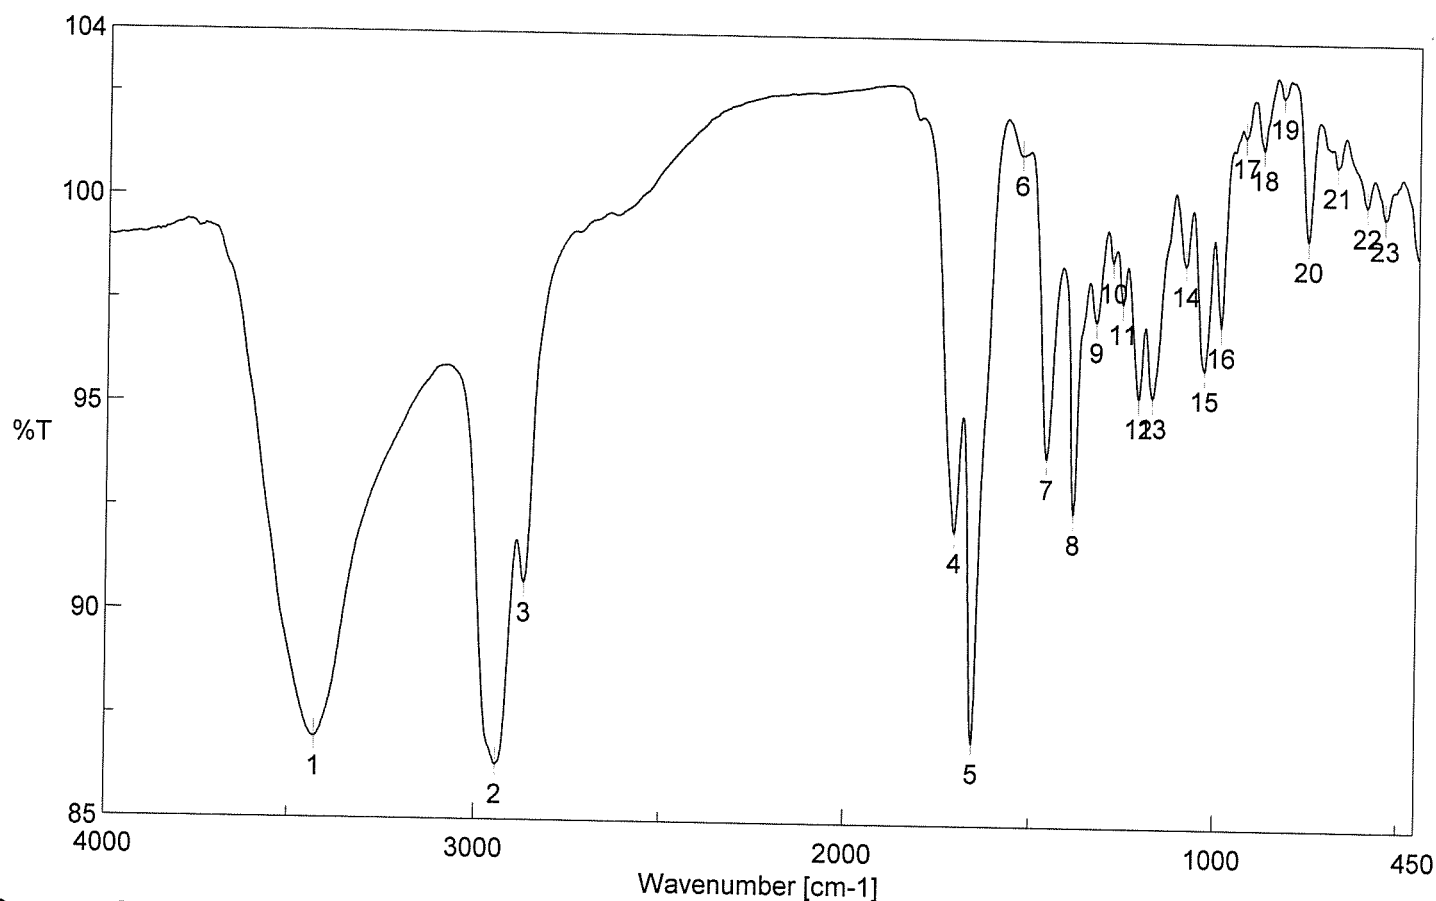

## [Comments]

Sample name SH-6 = 3  
Comment 24/1/2017  
User IR  
Division IR  
Company MAC

## [ Result of Peak Picking ]

| No. | Position | Intensity | No. | Position | Intensity | No. | Position | Intensity |
|-----|----------|-----------|-----|----------|-----------|-----|----------|-----------|
| 1   | 3429.78  | 86.9548   | 2   | 2943.8   | 86.3375   | 3   | 2869.56  | 90.7131   |
| ✓ 4 | 1705.73  | 92.0589   | 5   | 1655.59  | 87.0058   | 6   | 1531.2   | 101.182   |
| 7   | 1458.89  | 93.8509   | ✓ 8 | 1386.57  | 92.5409   | 9   | 1326.79  | 97.1883   |
| 10  | 1283.39  | 98.637    | 11  | 1256.4   | 97.6327   | 12  | 1212.04  | 95.3551   |
| 13  | 1174.44  | 95.3671   | 14  | 1085.73  | 98.5757   | 15  | 1033.66  | 96.0503   |
| 16  | 989.304  | 97.1092   | 17  | 923.736  | 101.707   | 18  | 874.56   | 101.419   |
| 19  | 821.527  | 102.686   | 20  | 752.102  | 99.2278   | 21  | 676.892  | 101.012   |
| 22  | 592.039  | 100.055   | 23  | 544.792  | 99.7612   |     |          |           |

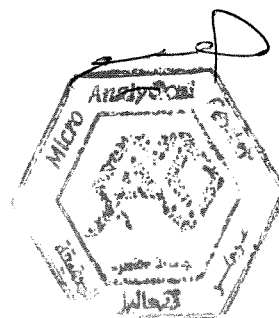

# Cairo University Micro Analytical Center

## DI Analysis Shimadzu Qp-2010 Plus

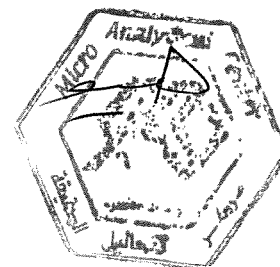

### Sample Information

Analyzed by : Dr. Mai Younis  
 Analyzed : 29/01/2017 11:41:43  
 Sample Name : Sh-6  
 Sample ID : 3  
 Customer Name : Dr. Gaber Osman - NRC  
 Data File : C:\GCMSsolution\Data\Project1\Sh-6.QGD  
 Org Data File : C:\GCMSsolution\Data\Project1\Sh-6.QGD  
 Method File : C:\GCMSsolution\Data\Project1\High Temperature Op  
 Org Method File : C:\GCMSsolution\Data\Project1\High Temperature Op  
 Report File :  
 Tuning File : C:\GCMSsolution\System1\Tune1\\_default.qgt  
 \$EndIf\$Modified by : Dr. Mai Younis  
 Modified : 29/01/2017 11:46:41

### Method

==== Analytical Line 1 ====  
 IonSourceTemp :250.00 °C  
 [MS Table]  
 --Group 1 - Event 1--  
 Start Time :0.00min  
 End Time :10.00min  
 ACQ Mode :Scan  
 Event Time :0.50sec  
 Scan Speed :1428  
 Start m/z :50.00  
 End m/z :700.00

Electron Voltage : 70 eV  
 Ionization Mode : EI

C:\GCMSsolution\Data\Project1\Sh-6.QGD

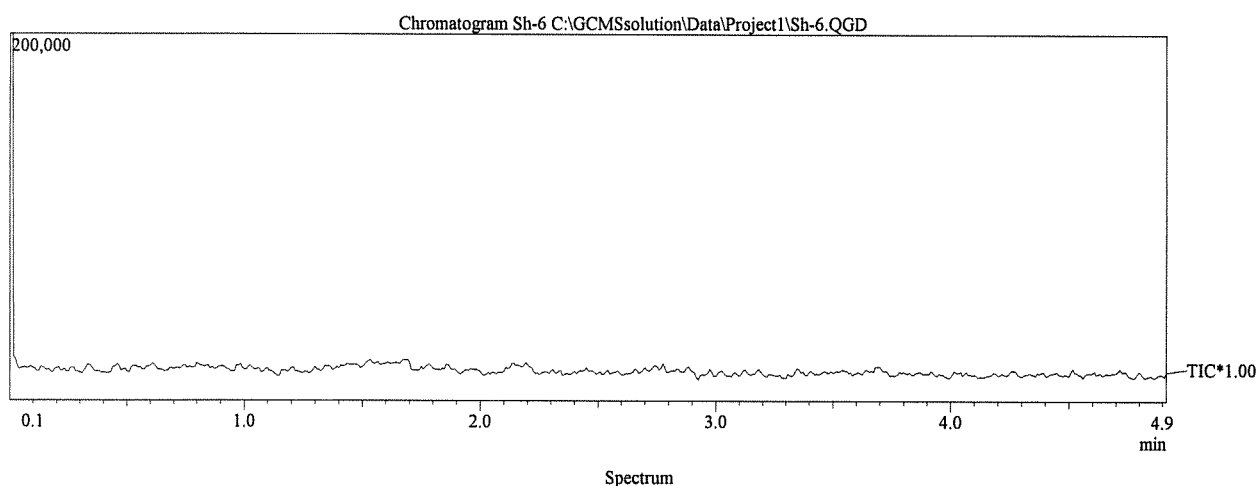

Line#:1 R.Time:2.8(Scan#:332)  
 MassPeaks:195  
 RawMode:Single 2.8(332) BasePeak:479(190)  
 BG Mode:None Group 1 - Event 1

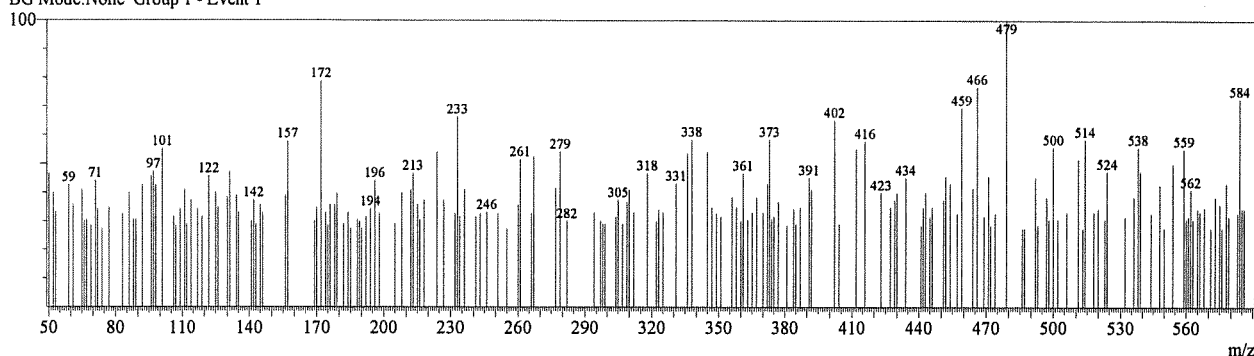

### Mass Table

Line#:1 R.Time:2.8(Scan#:332)  
 MassPeaks:195  
 RawMode:Single 2.8(332) BasePeak:479(190)  
 BG Mode:None Group 1 - Event 1

| # | m/z   | Abs. In | Rel. Int. | # | m/z   | Abs. In | Rel. Int. |
|---|-------|---------|-----------|---|-------|---------|-----------|
| 1 | 50.00 | 89      | 46.84     | 4 | 59.00 | 81      | 42.63     |
| 2 | 52.00 | 76      | 40.00     | 5 | 61.00 | 68      | 35.79     |
| 3 | 53.00 | 63      | 33.16     | 6 | 65.00 | 78      | 41.05     |
|   |       |         |           | 7 | 66.00 | 57      | 30.00     |
|   |       |         |           | 8 | 67.00 | 58      | 30.53     |
|   |       |         |           | 9 | 69.00 | 54      | 28.42     |

| #  | m/z    | Abs. In | Rel. Int. | #   | m/z    | Abs. In | Rel. Int. | #   | m/z    | Abs. In | Rel. Int. |
|----|--------|---------|-----------|-----|--------|---------|-----------|-----|--------|---------|-----------|
| 10 | 71.00  | 84      | 44.21     | 72  | 232.00 | 62      | 32.63     | 134 | 429.00 | 71      | 37.37     |
| 11 | 72.00  | 65      | 34.21     | 73  | 233.00 | 126     | 66.32     | 135 | 430.00 | 76      | 40.00     |
| 12 | 74.00  | 52      | 27.37     | 74  | 234.00 | 60      | 31.58     | 136 | 434.00 | 86      | 45.26     |
| 13 | 77.00  | 66      | 34.74     | 75  | 236.00 | 78      | 41.05     | 137 | 441.00 | 54      | 28.42     |
| 14 | 83.00  | 62      | 32.63     | 76  | 241.00 | 60      | 31.58     | 138 | 442.00 | 66      | 34.74     |
| 15 | 86.00  | 76      | 40.00     | 77  | 243.00 | 62      | 32.63     | 139 | 443.00 | 76      | 40.00     |
| 16 | 88.00  | 58      | 30.53     | 78  | 246.00 | 63      | 33.16     | 140 | 445.00 | 60      | 31.58     |
| 17 | 89.00  | 58      | 30.53     | 79  | 251.00 | 62      | 32.63     | 141 | 446.00 | 66      | 34.74     |
| 18 | 92.00  | 81      | 42.63     | 80  | 255.00 | 52      | 27.37     | 142 | 451.00 | 71      | 37.37     |
| 19 | 96.00  | 87      | 45.79     | 81  | 260.00 | 68      | 35.79     | 143 | 452.00 | 87      | 45.79     |
| 20 | 97.00  | 90      | 47.37     | 82  | 261.00 | 98      | 51.58     | 144 | 454.00 | 82      | 43.16     |
| 21 | 98.00  | 81      | 42.63     | 83  | 266.00 | 62      | 32.63     | 145 | 457.00 | 62      | 32.63     |
| 22 | 101.00 | 105     | 55.26     | 84  | 267.00 | 100     | 52.63     | 146 | 459.00 | 132     | 69.47     |
| 23 | 106.00 | 60      | 31.58     | 85  | 277.00 | 79      | 41.58     | 147 | 464.00 | 79      | 41.58     |
| 24 | 107.00 | 54      | 28.42     | 86  | 279.00 | 103     | 54.21     | 148 | 466.00 | 146     | 76.84     |
| 25 | 109.00 | 65      | 34.21     | 87  | 282.00 | 57      | 30.00     | 149 | 469.00 | 60      | 31.58     |
| 26 | 111.00 | 78      | 41.05     | 88  | 294.00 | 63      | 33.16     | 150 | 471.00 | 87      | 45.79     |
| 27 | 112.00 | 55      | 28.95     | 89  | 297.00 | 57      | 30.00     | 151 | 472.00 | 54      | 28.42     |
| 28 | 114.00 | 71      | 37.37     | 90  | 298.00 | 55      | 28.95     | 152 | 474.00 | 62      | 32.63     |
| 29 | 117.00 | 65      | 34.21     | 91  | 299.00 | 55      | 28.95     | 153 | 479.00 | 190     | 100.00    |
| 30 | 119.00 | 60      | 31.58     | 92  | 304.00 | 60      | 31.58     | 154 | 486.00 | 52      | 27.37     |
| 31 | 122.00 | 87      | 45.79     | 93  | 305.00 | 71      | 37.37     | 155 | 487.00 | 52      | 27.37     |
| 32 | 125.00 | 76      | 40.00     | 94  | 307.00 | 55      | 28.95     | 156 | 492.00 | 86      | 45.26     |
| 33 | 126.00 | 66      | 34.74     | 95  | 309.00 | 70      | 36.84     | 157 | 493.00 | 54      | 28.42     |
| 34 | 130.00 | 73      | 38.42     | 96  | 310.00 | 78      | 41.05     | 158 | 497.00 | 73      | 38.42     |
| 35 | 131.00 | 90      | 47.37     | 97  | 312.00 | 63      | 33.16     | 159 | 498.00 | 58      | 30.53     |
| 36 | 134.00 | 74      | 38.95     | 98  | 318.00 | 89      | 46.84     | 160 | 500.00 | 106     | 55.79     |
| 37 | 135.00 | 63      | 33.16     | 99  | 322.00 | 57      | 30.00     | 161 | 502.00 | 58      | 30.53     |
| 38 | 141.00 | 57      | 30.00     | 100 | 323.00 | 65      | 34.21     | 162 | 506.00 | 63      | 33.16     |
| 39 | 142.00 | 71      | 37.37     | 101 | 325.00 | 63      | 33.16     | 163 | 511.00 | 98      | 51.58     |
| 40 | 143.00 | 55      | 28.95     | 102 | 331.00 | 82      | 43.16     | 164 | 513.00 | 52      | 27.37     |
| 41 | 145.00 | 68      | 35.79     | 103 | 336.00 | 102     | 53.68     | 165 | 514.00 | 111     | 58.42     |
| 42 | 146.00 | 63      | 33.16     | 104 | 338.00 | 111     | 58.42     | 166 | 518.00 | 63      | 33.16     |
| 43 | 156.00 | 74      | 38.95     | 105 | 345.00 | 103     | 54.21     | 167 | 520.00 | 65      | 34.21     |
| 44 | 157.00 | 110     | 57.89     | 106 | 347.00 | 66      | 34.74     | 168 | 523.00 | 58      | 30.53     |
| 45 | 169.00 | 57      | 30.00     | 107 | 349.00 | 62      | 32.63     | 169 | 524.00 | 90      | 47.37     |
| 46 | 170.00 | 66      | 34.74     | 108 | 351.00 | 60      | 31.58     | 170 | 532.00 | 60      | 31.58     |
| 47 | 172.00 | 150     | 78.95     | 109 | 356.00 | 73      | 38.42     | 171 | 536.00 | 73      | 38.42     |
| 48 | 174.00 | 63      | 33.16     | 110 | 358.00 | 66      | 34.74     | 172 | 538.00 | 106     | 55.79     |
| 49 | 175.00 | 54      | 28.42     | 111 | 360.00 | 57      | 30.00     | 173 | 539.00 | 90      | 47.37     |
| 50 | 176.00 | 68      | 35.79     | 112 | 361.00 | 89      | 46.84     | 174 | 544.00 | 62      | 32.63     |
| 51 | 178.00 | 68      | 35.79     | 113 | 363.00 | 58      | 30.53     | 175 | 548.00 | 81      | 42.63     |
| 52 | 179.00 | 76      | 40.00     | 114 | 365.00 | 63      | 33.16     | 176 | 550.00 | 52      | 27.37     |
| 53 | 182.00 | 55      | 28.95     | 115 | 367.00 | 73      | 38.42     | 177 | 554.00 | 95      | 50.00     |
| 54 | 184.00 | 63      | 33.16     | 116 | 370.00 | 63      | 33.16     | 178 | 559.00 | 105     | 55.26     |
| 55 | 185.00 | 52      | 27.37     | 117 | 372.00 | 82      | 43.16     | 179 | 560.00 | 58      | 30.53     |
| 56 | 188.00 | 58      | 30.53     | 118 | 373.00 | 111     | 58.42     | 180 | 561.00 | 60      | 31.58     |
| 57 | 189.00 | 57      | 30.00     | 119 | 374.00 | 58      | 30.53     | 181 | 562.00 | 78      | 41.05     |
| 58 | 190.00 | 52      | 27.37     | 120 | 375.00 | 60      | 31.58     | 182 | 563.00 | 58      | 30.53     |
| 59 | 192.00 | 60      | 31.58     | 121 | 377.00 | 70      | 36.84     | 183 | 565.00 | 65      | 34.21     |
| 60 | 194.00 | 65      | 34.21     | 122 | 381.00 | 54      | 28.42     | 184 | 566.00 | 63      | 33.16     |
| 61 | 196.00 | 84      | 44.21     | 123 | 384.00 | 65      | 34.21     | 185 | 568.00 | 66      | 34.74     |
| 62 | 198.00 | 62      | 32.63     | 124 | 385.00 | 55      | 28.95     | 186 | 571.00 | 52      | 27.37     |
| 63 | 205.00 | 55      | 28.95     | 125 | 387.00 | 66      | 34.74     | 187 | 573.00 | 73      | 38.42     |
| 64 | 208.00 | 76      | 40.00     | 126 | 391.00 | 86      | 45.26     | 188 | 575.00 | 68      | 35.79     |
| 65 | 212.00 | 78      | 41.05     | 127 | 392.00 | 78      | 41.05     | 189 | 576.00 | 52      | 27.37     |
| 66 | 213.00 | 89      | 46.84     | 128 | 402.00 | 124     | 65.26     | 190 | 578.00 | 82      | 43.16     |
| 67 | 215.00 | 68      | 35.79     | 129 | 404.00 | 55      | 28.95     | 191 | 579.00 | 60      | 31.58     |
| 68 | 216.00 | 58      | 30.53     | 130 | 412.00 | 105     | 55.26     | 192 | 583.00 | 62      | 32.63     |
| 69 | 218.00 | 71      | 37.37     | 131 | 416.00 | 110     | 57.89     | 193 | 584.00 | 138     | 72.63     |
| 70 | 224.00 | 103     | 54.21     | 132 | 423.00 | 76      | 40.00     | 194 | 585.00 | 65      | 34.21     |
| 71 | 227.00 | 71      | 37.37     | 133 | 427.00 | 66      | 34.74     | 195 | 586.00 | 65      | 34.21     |

# Peak Find - Memory-193

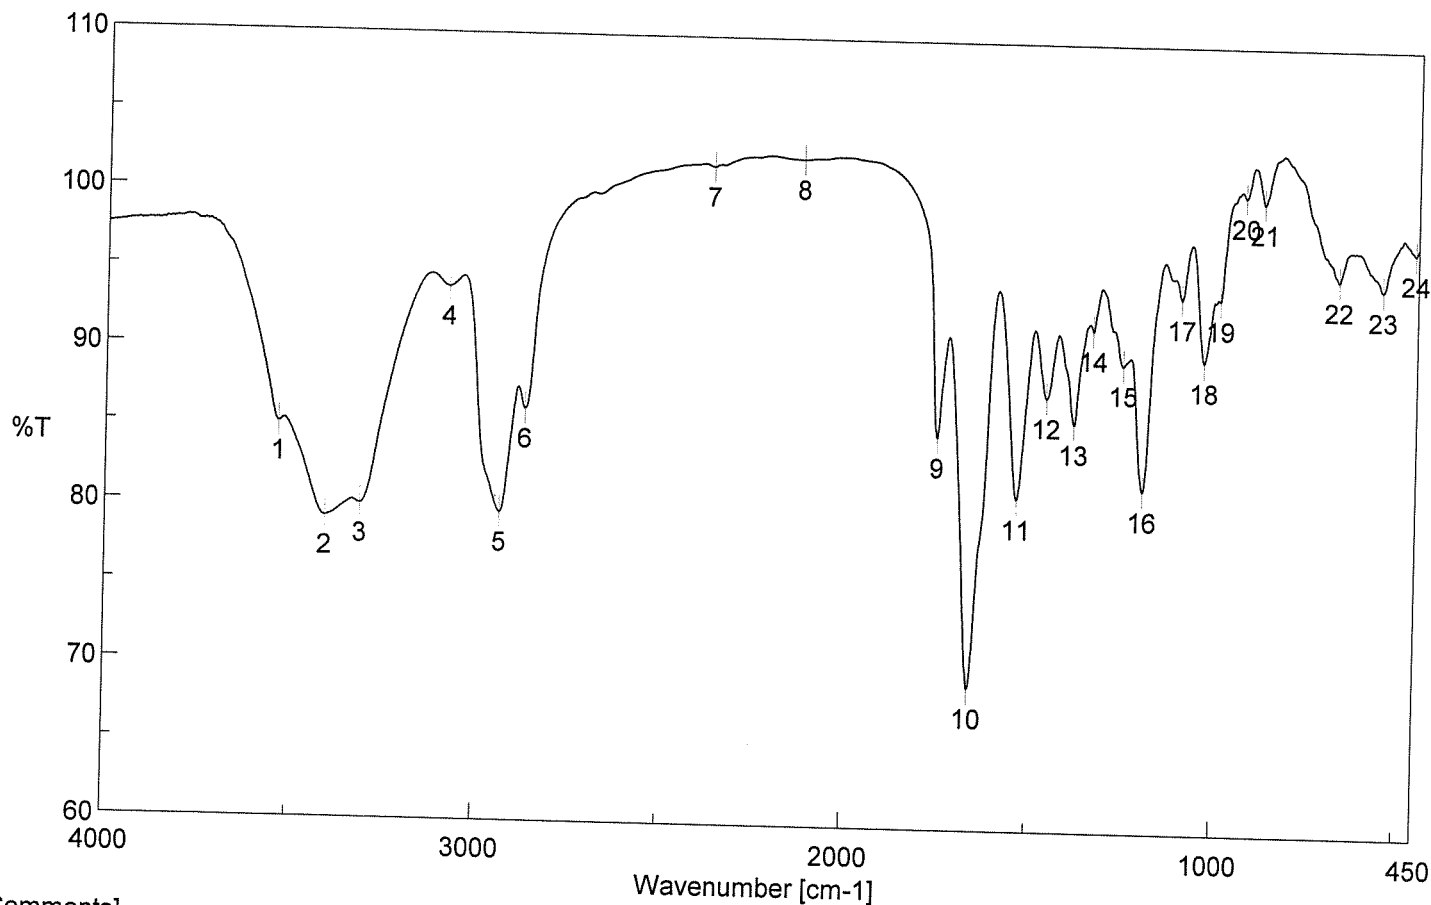

## [Comments]

Sample name SH-11 = 4  
 Comment 24/1/2017  
 User IR  
 Division IR  
 Company MAC

## [ Result of Peak Picking ]

| No. | Position | Intensity | No. | Position | Intensity | No. | Position | Intensity |
|-----|----------|-----------|-----|----------|-----------|-----|----------|-----------|
| 1   | 3531.02  | 84.968    | 2   | 3402.78  | 79.0906   | 3   | 3310.21  | 79.8951   |
| 4   | 3075.9   | 93.779    | 5   | 2934.16  | 79.5012   | 6   | 2868.59  | 86.0632   |
| 7   | 2365.26  | 101.715   | 8   | 2121.31  | 102.281   | 9   | 1752.01  | 84.7788   |
| 10  | 1660.41  | 69        | 11  | 1535.06  | 81.006    | 12  | 1457.92  | 87.4395   |
| 13  | 1383.68  | 85.8063   | 14  | 1334.5   | 91.8111   | 15  | 1252.54  | 89.6315   |
| 16  | 1196.61  | 81.6607   | 17  | 1095.37  | 93.9249   | 18  | 1032.69  | 89.9079   |
| 19  | 990.268  | 93.8942   | 20  | 923.736  | 100.48    | 21  | 872.631  | 100.112   |
| 22  | 667.25   | 95.2613   | 23  | 545.756  | 94.7026   | 24  | 458.975  | 97.0863   |

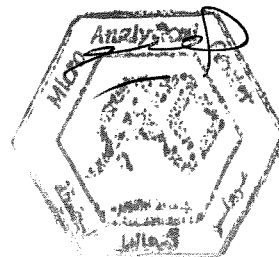

# Cairo University Micro Analytical Center

## DI Analysis Shimadzu Qp-2010 Plus

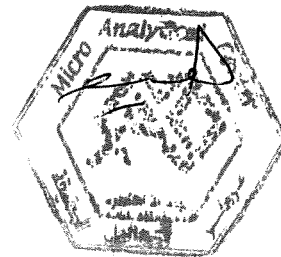

### Sample Information

Analyzed by : Dr. Mai Younis  
 Analyzed : 29/01/2017 12:13:57  
 Sample Name : Sh-11 = 4  
 Sample ID :  
 Customer Name : Dr. Gaber Osman - NRC  
 Data File : C:\GCMSsolution\Data\Project1\Sh-11.QGD  
 Org Data File : C:\GCMSsolution\Data\Project1\Sh-11.QGD  
 Method File : C:\GCMSsolution\Data\Project1\High Temperature Op  
 Org Method File : C:\GCMSsolution\Data\Project1\High Temperature Op  
 Report File :  
 Tuning File : C:\GCMSsolution\System\Tune1\\_default.qgt  
 SEndIf\$Modified by : Dr. Mai Younis  
 Modified : 29/01/2017 12:21:46

### Method

==== Analytical Line 1 ====  
 IonSourceTemp : 250.00 °C  
 [MS Table]  
 --Group 1 - Event 1--  
 Start Time : 0.00min  
 End Time : 10.00min  
 ACQ Mode : Scan  
 Event Time : 0.50sec  
 Scan Speed : 1666  
 Start m/z : 50.00  
 End m/z : 750.00

Electron Voltage : 70 eV  
 Ionization Mode : EI

C:\GCMSsolution\Data\Project1\Sh-11.QGD

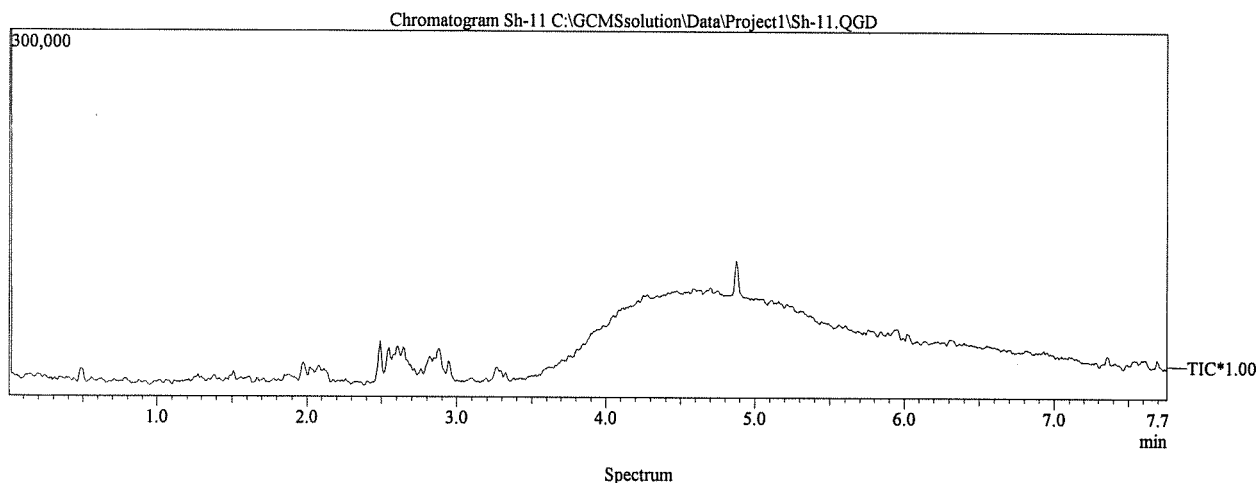

Line#:1 R.Time:4.2(Scan#:505)

MassPeaks:220

RawMode:Single 4.2(505) BasePeak:613(28959)

BG Mode:None Group 1 - Event 1

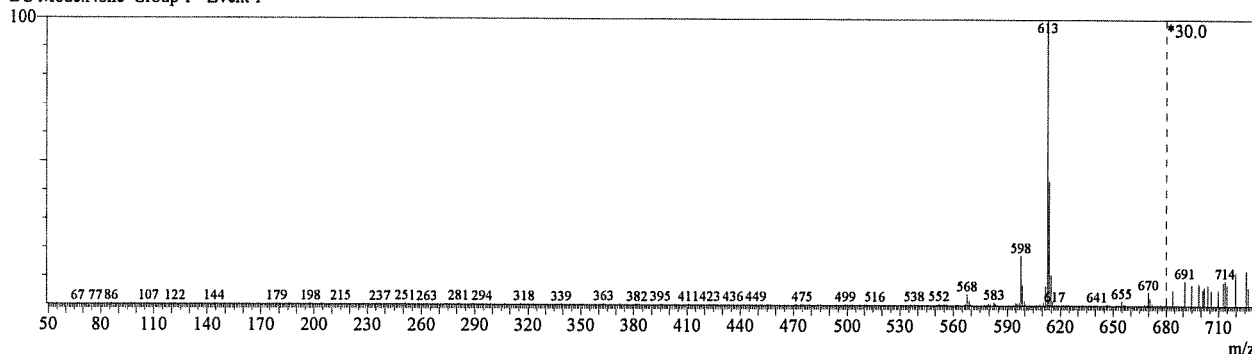

### Mass Table

Line#:1 R.Time:4.2(Scan#:505)

MassPeaks:220

RawMode:Single 4.2(505) BasePeak:613(28959)

BG Mode:None Group 1 - Event 1

| # | m/z   | Abs. In | Rel. Int. | # | m/z   | Abs. In | Rel. Int. | # | m/z   | Abs. In | Rel. Int. |
|---|-------|---------|-----------|---|-------|---------|-----------|---|-------|---------|-----------|
| 1 | 50.00 | 63      | 0.22      | 4 | 67.00 | 81      | 0.28      | 7 | 79.00 | 60      | 0.21      |
| 2 | 52.00 | 62      | 0.21      | 5 | 68.00 | 70      | 0.24      | 8 | 84.00 | 55      | 0.19      |
| 3 | 55.00 | 52      | 0.18      | 6 | 77.00 | 81      | 0.28      | 9 | 86.00 | 84      | 0.29      |

| #  | m/z    | Abs. In | Rel. Int. | #   | m/z    | Abs. In | Rel. Int. | #   | m/z    | Abs. In | Rel. Int. |
|----|--------|---------|-----------|-----|--------|---------|-----------|-----|--------|---------|-----------|
| 10 | 93.00  | 73      | 0.25      | 79  | 362.00 | 106     | 0.37      | 148 | 580.70 | 145     | 0.50      |
| 11 | 96.00  | 52      | 0.18      | 80  | 363.00 | 127     | 0.44      | 149 | 582.70 | 330     | 1.14      |
| 12 | 97.00  | 52      | 0.18      | 81  | 364.00 | 79      | 0.27      | 150 | 583.70 | 177     | 0.61      |
| 13 | 98.00  | 58      | 0.20      | 82  | 372.00 | 84      | 0.29      | 151 | 584.70 | 74      | 0.26      |
| 14 | 99.00  | 81      | 0.28      | 83  | 381.00 | 57      | 0.20      | 152 | 590.70 | 79      | 0.27      |
| 15 | 105.00 | 54      | 0.19      | 84  | 382.00 | 62      | 0.21      | 153 | 593.70 | 78      | 0.27      |
| 16 | 106.00 | 54      | 0.19      | 85  | 383.00 | 55      | 0.19      | 154 | 594.70 | 258     | 0.89      |
| 17 | 107.00 | 94      | 0.32      | 86  | 395.00 | 103     | 0.36      | 155 | 595.70 | 183     | 0.63      |
| 18 | 119.00 | 68      | 0.23      | 87  | 396.00 | 71      | 0.25      | 156 | 596.70 | 278     | 0.96      |
| 19 | 120.00 | 74      | 0.26      | 88  | 400.00 | 60      | 0.21      | 157 | 597.75 | 5081    | 17.55     |
| 20 | 122.00 | 84      | 0.29      | 89  | 403.00 | 66      | 0.23      | 158 | 598.70 | 2095    | 7.23      |
| 21 | 128.00 | 58      | 0.20      | 90  | 404.00 | 74      | 0.26      | 159 | 599.70 | 489     | 1.69      |
| 22 | 133.00 | 97      | 0.33      | 91  | 411.00 | 100     | 0.35      | 160 | 600.70 | 126     | 0.44      |
| 23 | 144.00 | 86      | 0.30      | 92  | 414.00 | 58      | 0.20      | 161 | 602.70 | 78      | 0.27      |
| 24 | 150.00 | 63      | 0.22      | 93  | 423.00 | 100     | 0.35      | 162 | 606.70 | 55      | 0.19      |
| 25 | 153.00 | 57      | 0.20      | 94  | 425.00 | 70      | 0.24      | 163 | 608.70 | 119     | 0.41      |
| 26 | 155.00 | 65      | 0.22      | 95  | 427.00 | 60      | 0.21      | 164 | 610.70 | 351     | 1.21      |
| 27 | 157.00 | 60      | 0.21      | 96  | 431.00 | 65      | 0.22      | 165 | 611.85 | 1998    | 6.90      |
| 28 | 162.00 | 60      | 0.21      | 97  | 433.00 | 78      | 0.27      | 166 | 612.80 | 28959   | 100.00    |
| 29 | 169.00 | 66      | 0.23      | 98  | 436.00 | 111     | 0.38      | 167 | 613.80 | 12618   | 43.57     |
| 30 | 175.00 | 55      | 0.19      | 99  | 445.00 | 68      | 0.23      | 168 | 614.80 | 3124    | 10.79     |
| 31 | 177.00 | 70      | 0.24      | 100 | 449.00 | 94      | 0.32      | 169 | 615.75 | 523     | 1.81      |
| 32 | 179.00 | 86      | 0.30      | 101 | 452.00 | 65      | 0.22      | 170 | 616.80 | 118     | 0.41      |
| 33 | 180.00 | 60      | 0.21      | 102 | 455.00 | 58      | 0.20      | 171 | 617.80 | 62      | 0.21      |
| 34 | 186.00 | 94      | 0.32      | 103 | 456.00 | 52      | 0.18      | 172 | 618.80 | 86      | 0.30      |
| 35 | 197.00 | 95      | 0.33      | 104 | 457.00 | 78      | 0.27      | 173 | 620.80 | 89      | 0.31      |
| 36 | 198.00 | 110     | 0.38      | 105 | 471.00 | 65      | 0.22      | 174 | 621.80 | 90      | 0.31      |
| 37 | 201.00 | 78      | 0.27      | 106 | 472.00 | 70      | 0.24      | 175 | 622.80 | 52      | 0.18      |
| 38 | 204.00 | 60      | 0.21      | 107 | 474.00 | 71      | 0.25      | 176 | 623.80 | 111     | 0.38      |
| 39 | 205.00 | 54      | 0.19      | 108 | 475.00 | 100     | 0.35      | 177 | 624.80 | 102     | 0.35      |
| 40 | 215.00 | 87      | 0.30      | 109 | 476.00 | 70      | 0.24      | 178 | 625.80 | 52      | 0.18      |
| 41 | 217.00 | 73      | 0.25      | 110 | 479.00 | 70      | 0.24      | 179 | 628.80 | 60      | 0.21      |
| 42 | 224.00 | 68      | 0.23      | 111 | 484.00 | 57      | 0.20      | 180 | 630.80 | 57      | 0.20      |
| 43 | 226.00 | 55      | 0.19      | 112 | 485.00 | 92      | 0.32      | 181 | 632.80 | 87      | 0.30      |
| 44 | 227.00 | 68      | 0.23      | 113 | 494.00 | 66      | 0.23      | 182 | 635.80 | 73      | 0.25      |
| 45 | 228.00 | 57      | 0.20      | 114 | 499.00 | 90      | 0.31      | 183 | 636.80 | 65      | 0.22      |
| 46 | 235.00 | 52      | 0.18      | 115 | 500.00 | 62      | 0.21      | 184 | 637.80 | 68      | 0.23      |
| 47 | 237.00 | 73      | 0.25      | 116 | 502.00 | 63      | 0.22      | 185 | 639.80 | 55      | 0.19      |
| 48 | 246.00 | 52      | 0.18      | 117 | 503.00 | 70      | 0.24      | 186 | 640.80 | 89      | 0.31      |
| 49 | 251.00 | 127     | 0.44      | 118 | 507.00 | 54      | 0.19      | 187 | 645.80 | 57      | 0.20      |
| 50 | 253.00 | 74      | 0.26      | 119 | 510.00 | 87      | 0.30      | 188 | 646.80 | 150     | 0.52      |
| 51 | 255.00 | 65      | 0.22      | 120 | 511.00 | 84      | 0.29      | 189 | 647.80 | 87      | 0.30      |
| 52 | 258.00 | 60      | 0.21      | 121 | 516.00 | 89      | 0.31      | 190 | 651.80 | 86      | 0.30      |
| 53 | 261.00 | 68      | 0.23      | 122 | 521.00 | 58      | 0.20      | 191 | 652.80 | 68      | 0.23      |
| 54 | 263.00 | 76      | 0.26      | 123 | 527.00 | 87      | 0.30      | 192 | 653.80 | 95      | 0.33      |
| 55 | 266.00 | 71      | 0.25      | 124 | 531.00 | 73      | 0.25      | 193 | 654.80 | 455     | 1.57      |
| 56 | 269.00 | 68      | 0.23      | 125 | 536.00 | 55      | 0.19      | 194 | 655.80 | 210     | 0.73      |
| 57 | 274.00 | 62      | 0.21      | 126 | 538.00 | 124     | 0.43      | 195 | 656.80 | 55      | 0.19      |
| 58 | 276.00 | 57      | 0.20      | 127 | 540.00 | 57      | 0.20      | 196 | 662.80 | 63      | 0.22      |
| 59 | 281.00 | 118     | 0.41      | 128 | 546.00 | 60      | 0.21      | 197 | 664.80 | 66      | 0.23      |
| 60 | 289.00 | 87      | 0.30      | 129 | 551.00 | 79      | 0.27      | 198 | 667.80 | 132     | 0.46      |
| 61 | 294.00 | 84      | 0.29      | 130 | 552.00 | 178     | 0.61      | 199 | 668.90 | 103     | 0.36      |
| 62 | 299.00 | 60      | 0.21      | 131 | 553.00 | 65      | 0.22      | 200 | 669.90 | 1370    | 4.73      |
| 63 | 307.00 | 54      | 0.19      | 132 | 554.00 | 102     | 0.35      | 201 | 670.80 | 700     | 2.42      |
| 64 | 316.00 | 73      | 0.25      | 133 | 555.00 | 122     | 0.42      | 202 | 671.80 | 210     | 0.73      |
| 65 | 318.00 | 82      | 0.28      | 134 | 556.00 | 132     | 0.46      | 203 | 674.80 | 60      | 0.21      |
| 66 | 320.00 | 57      | 0.20      | 135 | 557.00 | 63      | 0.22      | 204 | 676.80 | 73      | 0.25      |
| 67 | 323.00 | 90      | 0.31      | 136 | 561.00 | 70      | 0.24      | 205 | 679.80 | 121     | 0.42      |
| 68 | 329.00 | 58      | 0.20      | 137 | 562.00 | 57      | 0.20      | 206 | 683.80 | 52      | 0.18      |
| 69 | 336.00 | 52      | 0.18      | 138 | 563.00 | 68      | 0.23      | 207 | 690.80 | 84      | 0.29      |
| 70 | 337.00 | 62      | 0.21      | 139 | 566.00 | 60      | 0.21      | 208 | 694.80 | 71      | 0.25      |
| 71 | 339.00 | 74      | 0.26      | 140 | 566.70 | 172     | 0.59      | 209 | 698.80 | 74      | 0.26      |
| 72 | 344.00 | 65      | 0.22      | 141 | 567.70 | 1162    | 4.01      | 210 | 700.80 | 55      | 0.19      |
| 73 | 346.00 | 54      | 0.19      | 142 | 568.70 | 489     | 1.69      | 211 | 701.80 | 63      | 0.22      |
| 74 | 349.00 | 63      | 0.22      | 143 | 569.70 | 146     | 0.50      | 212 | 703.80 | 68      | 0.23      |
| 75 | 350.00 | 86      | 0.30      | 144 | 570.70 | 74      | 0.26      | 213 | 705.80 | 52      | 0.18      |
| 76 | 351.00 | 52      | 0.18      | 145 | 577.70 | 54      | 0.19      | 214 | 709.80 | 52      | 0.18      |
| 77 | 358.00 | 82      | 0.28      | 146 | 578.70 | 65      | 0.22      | 215 | 712.80 | 79      | 0.27      |
| 78 | 361.00 | 57      | 0.20      | 147 | 579.70 | 238     | 0.82      | 216 | 713.80 | 84      | 0.29      |

| #   | m/z    | Abs. In | Rel. Int. | #   | m/z    | Abs. In | Rel. Int. |
|-----|--------|---------|-----------|-----|--------|---------|-----------|
| 217 | 714.80 | 73      | 0.25      | 219 | 725.80 | 118     | 0.41      |
| 218 | 719.80 | 114     | 0.39      | 220 | 726.80 | 62      | 0.21      |

# Peak Find - Memory-152

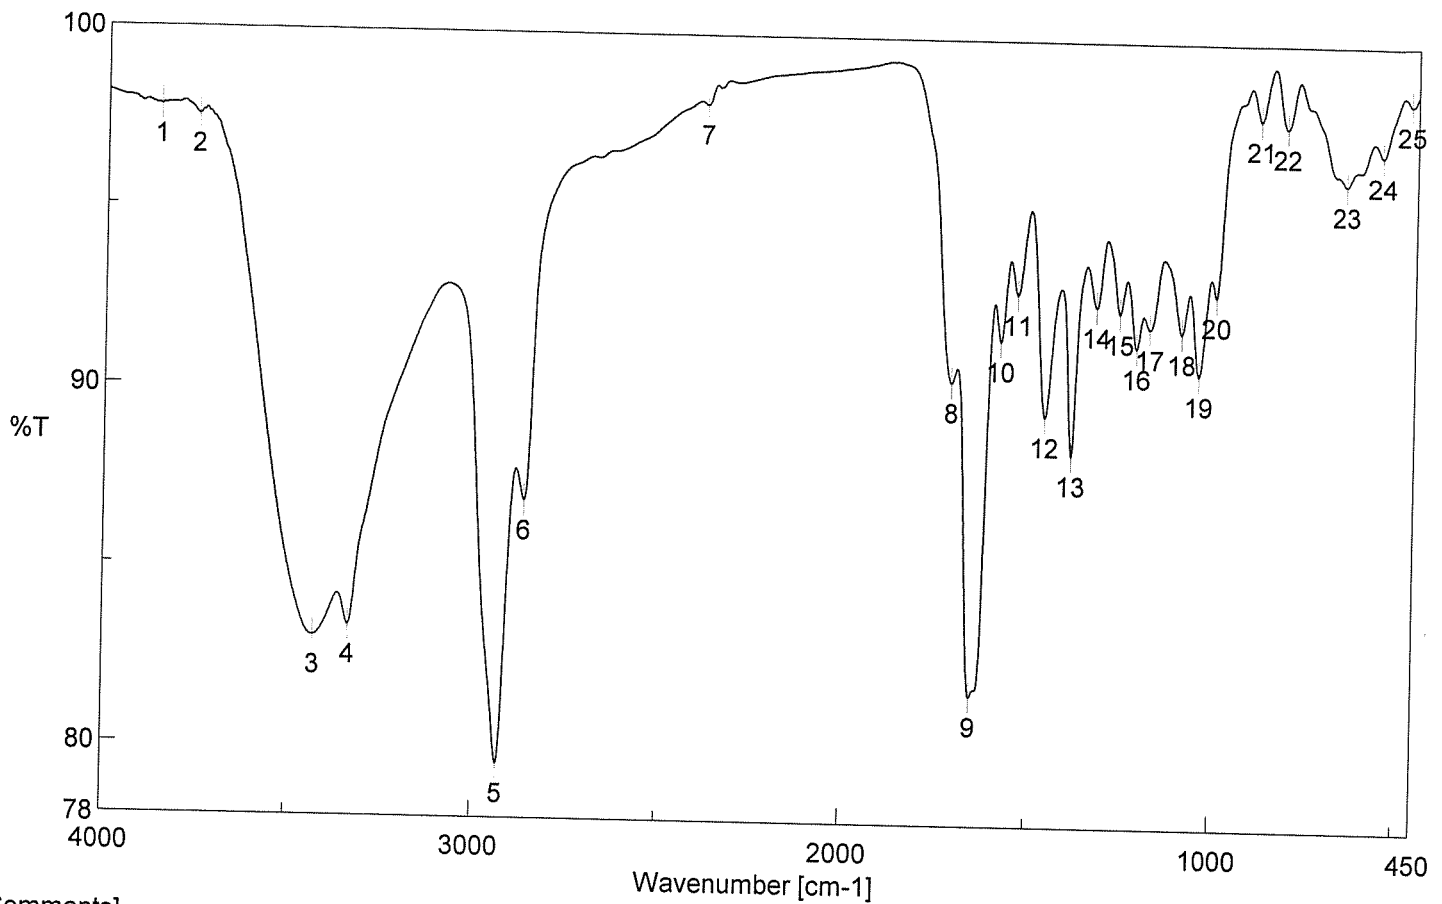

## [Comments]

Sample name SH-9 = 5  
 Comment 24/1/2017  
 User IR  
 Division IR  
 Company MAC

## [ Result of Peak Picking ]

| No. | Position | Intensity | No. | Position | Intensity | No. | Position | Intensity |
|-----|----------|-----------|-----|----------|-----------|-----|----------|-----------|
| 1   | 3855.01  | 97.7664   | 2   | 3750.87  | 97.5152   | ✓3  | 3424.96  | 83.0301   |
| 4   | 3330.46  | 83.3404   | 5   | 2930.31  | 79.5166   | 6   | 2862.81  | 86.8743   |
| 7   | 2377.8   | 98.0177   | 8   | 1707.66  | 90.3724   | ✓9  | 1650.77  | 81.6265   |
| 10  | 1577.49  | 91.5566   | 11  | 1533.13  | 92.8651   | 12  | 1456.96  | 89.4517   |
| 13  | 1385.6   | 88.3861   | 14  | 1320.04  | 92.5549   | 15  | 1256.4   | 92.3831   |
| 16  | 1210.11  | 91.4192   | 17  | 1174.44  | 91.9701   | 18  | 1087.66  | 91.855    |
| 19  | 1039.44  | 90.6812   | 20  | 994.125  | 92.9028   | 21  | 879.381  | 97.8637   |
| 22  | 807.063  | 97.6593   | 23  | 642.179  | 96.0794   | 24  | 545.756  | 96.9008   |
| 25  | 468.617  | 98.3735   |     |          |           |     |          |           |

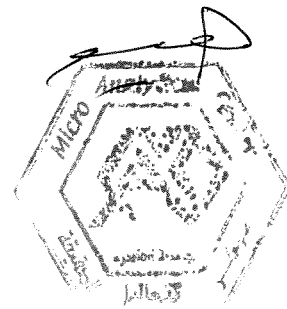



# Cairo University Micro Analytical Center

**DI Analysis**  
**Shimadzu Qp-2010 Plus**

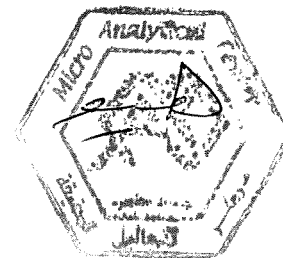

## Sample Information

Analyzed by : Dr. Mai Younis  
 Analyzed : 29/01/2017 11:53:23 ص  
 Sample Name : Sh-9 25  
 Sample ID :  
 Customer Name : Dr. Gaber Osman - NRC  
 Data File : C:\GCMSsolution\Data\Project1\Sh-9.QGD  
 Org Data File : C:\GCMSsolution\Data\Project1\Sh-9.QGD  
 Method File : C:\GCMSsolution\Data\Project1\High Temperature Op  
 Org Method File : C:\GCMSsolution\Data\Project1\High Temperature Op  
 Report File :  
 Tuning File : C:\GCMSsolution\System\Tune1\\_default.qgt  
 \$EndIf\$Modified by : Dr. Mai Younis  
 Modified : 29/01/2017 11:59:38 ص

## Method

==== Analytical Line 1 ====  
 IonSourceTemp : 250.00 °C  
 [MS Table]  
 --Group 1 - Event 1--  
 Start Time : 0.00min  
 End Time : 10.00min  
 ACQ Mode : Scan  
 Event Time : 0.50sec  
 Scan Speed : 1666  
 Start m/z : 50.00  
 End m/z : 750.00

Electron Voltage : 70 eV  
 Ionization Mode : EI

C:\GCMSsolution\Data\Project1\Sh-9.QGD

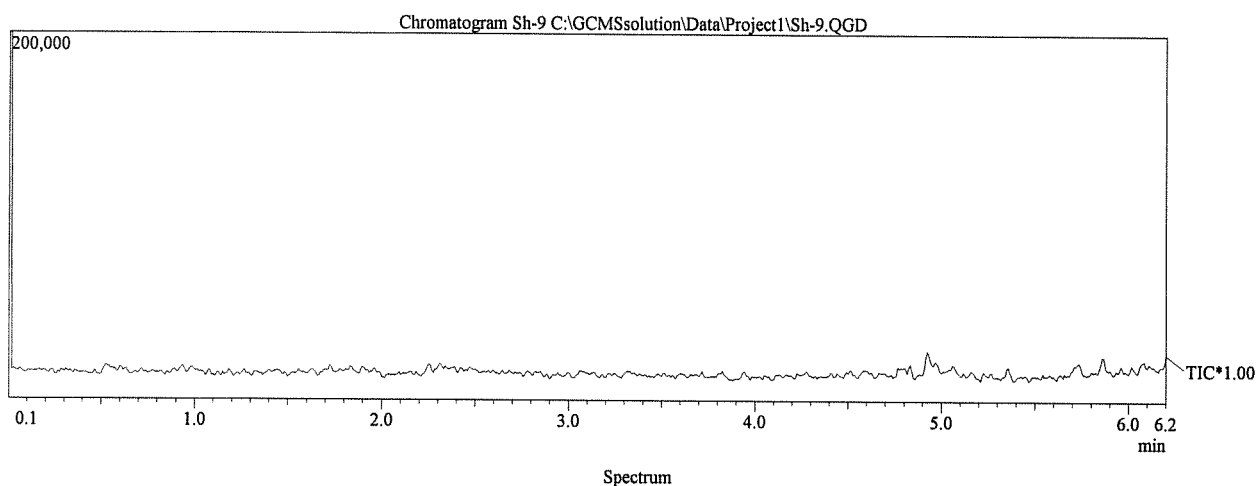

Line#:1 R.Time:4.3(Scan#:522)

MassPeaks:185

RawMode:Single 4.3(522) BasePeak:366(124)

BG Mode:None Group 1 - Event 1

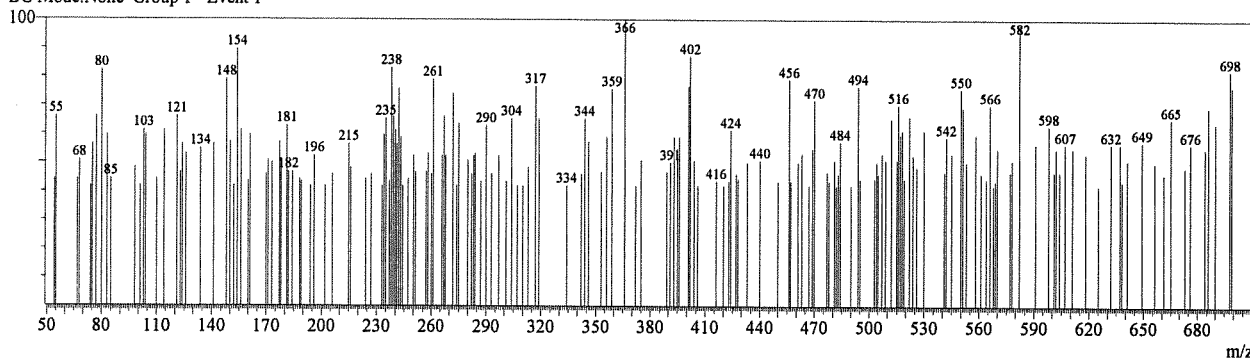

## Mass Table

Line#:1 R.Time:4.3(Scan#:522)

MassPeaks:185

RawMode:Single 4.3(522) BasePeak:366(124)

BG Mode:None Group 1 - Event 1

| # | m/z   | Abs. In | Rel. Int. | # | m/z   | Abs. In | Rel. Int. |
|---|-------|---------|-----------|---|-------|---------|-----------|
| 1 | 54.00 | 55      | 44.35     | 4 | 68.00 | 63      | 50.81     |
| 2 | 55.00 | 82      | 66.13     | 5 | 74.00 | 52      | 41.94     |
| 3 | 67.00 | 55      | 44.35     | 6 | 75.00 | 70      | 56.45     |
|   |       |         |           | 7 | 77.00 | 82      | 66.13     |
|   |       |         |           | 8 | 80.00 | 102     | 82.26     |
|   |       |         |           | 9 | 83.00 | 74      | 59.68     |

| #  | m/z    | Abs. In | Ref. Int. | #   | m/z    | Abs. In | Rel. Int. | #   | m/z    | Abs. In | Rel. Int. |
|----|--------|---------|-----------|-----|--------|---------|-----------|-----|--------|---------|-----------|
| 10 | 85.00  | 55      | 44.35     | 69  | 272.00 | 92      | 74.19     | 128 | 490.00 | 52      | 41.94     |
| 11 | 98.00  | 60      | 48.39     | 70  | 274.00 | 52      | 41.94     | 129 | 494.00 | 95      | 76.61     |
| 12 | 101.00 | 52      | 41.94     | 71  | 275.00 | 79      | 63.71     | 130 | 495.00 | 55      | 44.35     |
| 13 | 103.00 | 76      | 61.29     | 72  | 280.00 | 63      | 50.81     | 131 | 503.00 | 55      | 44.35     |
| 14 | 104.00 | 74      | 59.68     | 73  | 282.00 | 57      | 45.97     | 132 | 504.00 | 62      | 50.00     |
| 15 | 110.00 | 55      | 44.35     | 74  | 283.00 | 65      | 52.42     | 133 | 505.00 | 57      | 45.97     |
| 16 | 114.00 | 76      | 61.29     | 75  | 284.00 | 66      | 53.23     | 134 | 507.00 | 66      | 53.23     |
| 17 | 121.00 | 82      | 66.13     | 76  | 287.00 | 54      | 43.55     | 135 | 509.00 | 63      | 50.81     |
| 18 | 123.00 | 58      | 46.77     | 77  | 290.00 | 78      | 62.90     | 136 | 512.00 | 81      | 65.32     |
| 19 | 124.00 | 70      | 56.45     | 78  | 293.00 | 57      | 45.97     | 137 | 515.00 | 63      | 50.81     |
| 20 | 126.00 | 66      | 53.23     | 79  | 297.00 | 65      | 52.42     | 138 | 516.00 | 87      | 70.16     |
| 21 | 134.00 | 68      | 54.84     | 80  | 301.00 | 54      | 43.55     | 139 | 517.00 | 74      | 59.68     |
| 22 | 141.00 | 70      | 56.45     | 81  | 304.00 | 81      | 65.32     | 140 | 518.00 | 76      | 61.29     |
| 23 | 148.00 | 98      | 79.03     | 82  | 307.00 | 52      | 41.94     | 141 | 519.00 | 55      | 44.35     |
| 24 | 150.00 | 71      | 57.26     | 83  | 310.00 | 52      | 41.94     | 142 | 522.00 | 82      | 66.13     |
| 25 | 152.00 | 52      | 41.94     | 84  | 313.00 | 60      | 48.39     | 143 | 524.00 | 65      | 52.42     |
| 26 | 154.00 | 111     | 89.52     | 85  | 317.00 | 95      | 76.61     | 144 | 526.00 | 60      | 48.39     |
| 27 | 156.00 | 76      | 61.29     | 86  | 319.00 | 81      | 65.32     | 145 | 530.00 | 76      | 61.29     |
| 28 | 160.00 | 54      | 43.55     | 87  | 334.00 | 52      | 41.94     | 146 | 541.00 | 58      | 46.77     |
| 29 | 161.00 | 74      | 59.68     | 88  | 342.00 | 57      | 45.97     | 147 | 542.00 | 73      | 58.87     |
| 30 | 170.00 | 57      | 45.97     | 89  | 344.00 | 81      | 65.32     | 148 | 545.00 | 66      | 53.23     |
| 31 | 171.00 | 63      | 50.81     | 90  | 346.00 | 71      | 57.26     | 149 | 550.00 | 94      | 75.81     |
| 32 | 173.00 | 62      | 50.00     | 91  | 353.00 | 58      | 46.77     | 150 | 551.00 | 86      | 69.35     |
| 33 | 177.00 | 71      | 57.26     | 92  | 356.00 | 73      | 58.87     | 151 | 553.00 | 62      | 50.00     |
| 34 | 178.00 | 63      | 50.81     | 93  | 359.00 | 94      | 75.81     | 152 | 558.00 | 74      | 59.68     |
| 35 | 181.00 | 78      | 62.90     | 94  | 366.00 | 124     | 100.00    | 153 | 561.00 | 57      | 45.97     |
| 36 | 182.00 | 58      | 46.77     | 95  | 372.00 | 52      | 41.94     | 154 | 564.00 | 55      | 44.35     |
| 37 | 184.00 | 58      | 46.77     | 96  | 375.00 | 63      | 50.81     | 155 | 566.00 | 87      | 70.16     |
| 38 | 188.00 | 55      | 44.35     | 97  | 389.00 | 58      | 46.77     | 156 | 568.00 | 52      | 41.94     |
| 39 | 189.00 | 54      | 43.55     | 98  | 391.00 | 62      | 50.00     | 157 | 569.00 | 54      | 43.55     |
| 40 | 194.00 | 52      | 41.94     | 99  | 393.00 | 73      | 58.87     | 158 | 570.00 | 68      | 54.84     |
| 41 | 196.00 | 65      | 52.42     | 100 | 395.00 | 68      | 54.84     | 159 | 577.00 | 58      | 46.77     |
| 42 | 202.00 | 52      | 41.94     | 101 | 396.00 | 73      | 58.87     | 160 | 578.00 | 63      | 50.81     |
| 43 | 206.00 | 57      | 45.97     | 102 | 401.00 | 95      | 76.61     | 161 | 582.00 | 122     | 98.39     |
| 44 | 215.00 | 70      | 56.45     | 103 | 402.00 | 108     | 87.10     | 162 | 591.00 | 70      | 56.45     |
| 45 | 216.00 | 60      | 48.39     | 104 | 404.00 | 63      | 50.81     | 163 | 598.00 | 78      | 62.90     |
| 46 | 224.00 | 55      | 44.35     | 105 | 406.00 | 52      | 41.94     | 164 | 601.00 | 58      | 46.77     |
| 47 | 227.00 | 57      | 45.97     | 106 | 416.00 | 54      | 43.55     | 165 | 602.00 | 68      | 54.84     |
| 48 | 233.00 | 52      | 41.94     | 107 | 420.00 | 52      | 41.94     | 166 | 604.00 | 58      | 46.77     |
| 49 | 234.00 | 74      | 59.68     | 108 | 423.00 | 54      | 43.55     | 167 | 607.00 | 70      | 56.45     |
| 50 | 235.00 | 81      | 65.32     | 109 | 424.00 | 76      | 61.29     | 168 | 611.00 | 68      | 54.84     |
| 51 | 237.00 | 54      | 43.55     | 110 | 427.00 | 57      | 45.97     | 169 | 618.00 | 66      | 53.23     |
| 52 | 238.00 | 103     | 83.06     | 111 | 428.00 | 55      | 44.35     | 170 | 625.00 | 52      | 41.94     |
| 53 | 239.00 | 82      | 66.13     | 112 | 433.00 | 62      | 50.00     | 171 | 632.00 | 70      | 56.45     |
| 54 | 240.00 | 76      | 61.29     | 113 | 440.00 | 63      | 50.81     | 172 | 637.00 | 70      | 56.45     |
| 55 | 241.00 | 70      | 56.45     | 114 | 450.00 | 54      | 43.55     | 173 | 638.00 | 54      | 43.55     |
| 56 | 242.00 | 94      | 75.81     | 115 | 456.00 | 98      | 79.03     | 174 | 641.00 | 63      | 50.81     |
| 57 | 243.00 | 73      | 58.87     | 116 | 457.00 | 54      | 43.55     | 175 | 649.00 | 71      | 57.26     |
| 58 | 244.00 | 52      | 41.94     | 117 | 461.00 | 62      | 50.00     | 176 | 656.00 | 62      | 50.00     |
| 59 | 247.00 | 55      | 44.35     | 118 | 463.00 | 66      | 53.23     | 177 | 661.00 | 57      | 45.97     |
| 60 | 250.00 | 65      | 52.42     | 119 | 467.00 | 52      | 41.94     | 178 | 665.00 | 81      | 65.32     |
| 61 | 251.00 | 58      | 46.77     | 120 | 469.00 | 68      | 54.84     | 179 | 673.00 | 60      | 48.39     |
| 62 | 257.00 | 58      | 46.77     | 121 | 470.00 | 89      | 71.77     | 180 | 676.00 | 70      | 56.45     |
| 63 | 258.00 | 66      | 53.23     | 122 | 477.00 | 58      | 46.77     | 181 | 684.00 | 68      | 54.84     |
| 64 | 260.00 | 57      | 45.97     | 123 | 478.00 | 54      | 43.55     | 182 | 686.00 | 86      | 69.35     |
| 65 | 261.00 | 98      | 79.03     | 124 | 481.00 | 63      | 50.81     | 183 | 690.00 | 79      | 63.71     |
| 66 | 266.00 | 65      | 52.42     | 125 | 482.00 | 52      | 41.94     | 184 | 698.00 | 102     | 82.26     |
| 67 | 267.00 | 82      | 66.13     | 126 | 483.00 | 57      | 45.97     | 185 | 699.00 | 95      | 76.61     |
| 68 | 268.00 | 65      | 52.42     | 127 | 484.00 | 71      | 57.26     |     |        |         |           |

# Peak Find - Memory-155

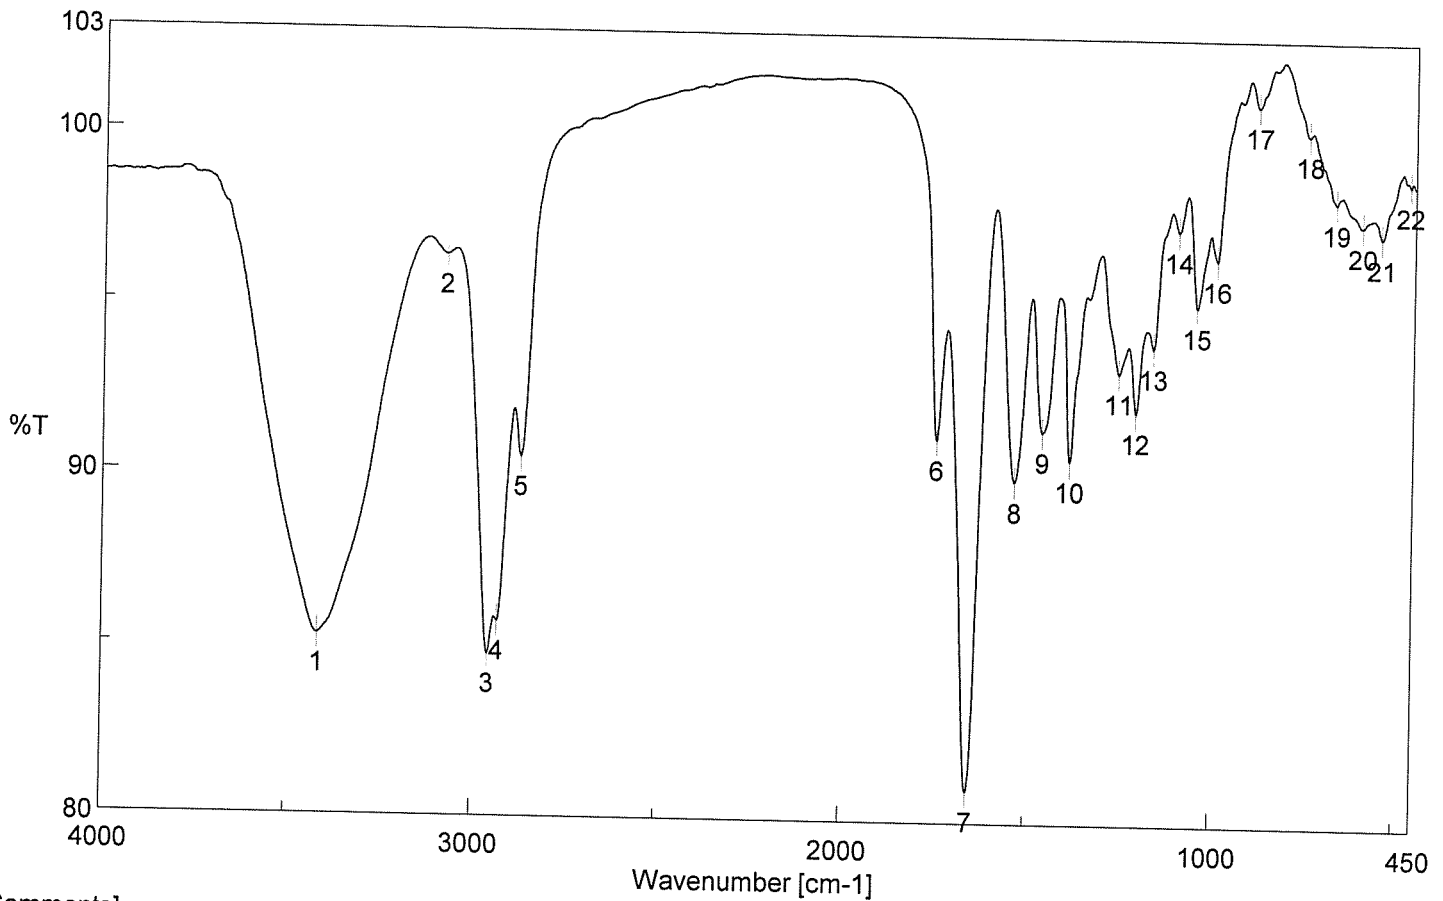

## [Comments]

Sample name SH-10 = 7  
 Comment 24/1/2017  
 User IR  
 Division IR  
 Company MAC

## [ Result of Peak Picking ]

| No.  | Position | Intensity | No. | Position | Intensity | No. | Position | Intensity |
|------|----------|-----------|-----|----------|-----------|-----|----------|-----------|
| 1    | 3414.35  | 85.2733   | ✓ 2 | 3072.05  | 96.3645   | ✓ 3 | 2956.34  | 84.737    |
| 4    | 2931.27  | 85.6993   | 5   | 2869.56  | 90.4874   | 6   | 1744.3   | 91.1526   |
| 7    | 1656.55  | 80.9428   | ✓ 8 | 1532.17  | 89.9617   | ✓ 9 | 1458.89  | 91.4227   |
| ✓ 10 | 1384.64  | 90.5868   | 11  | 1253.5   | 93.1838   | 12  | 1207.22  | 92.0273   |
| 13   | 1159.97  | 93.9263   | 14  | 1094.4   | 97.3515   | 15  | 1043.3   | 95.1443   |
| 16   | 990.268  | 96.5226   | 17  | 880.345  | 101.067   | 18  | 742.46   | 100.231   |
| 19   | 668.214  | 98.2486   | 20  | 593.968  | 97.5846   | 21  | 542.863  | 97.255    |
| 22   | 465.725  | 98.7938   |     |          |           |     |          |           |

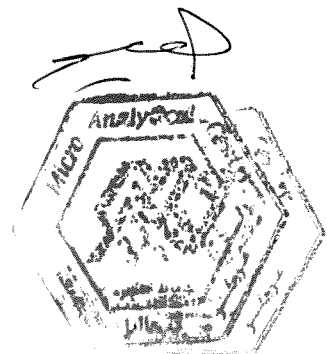

# Peak Find - Memory-174

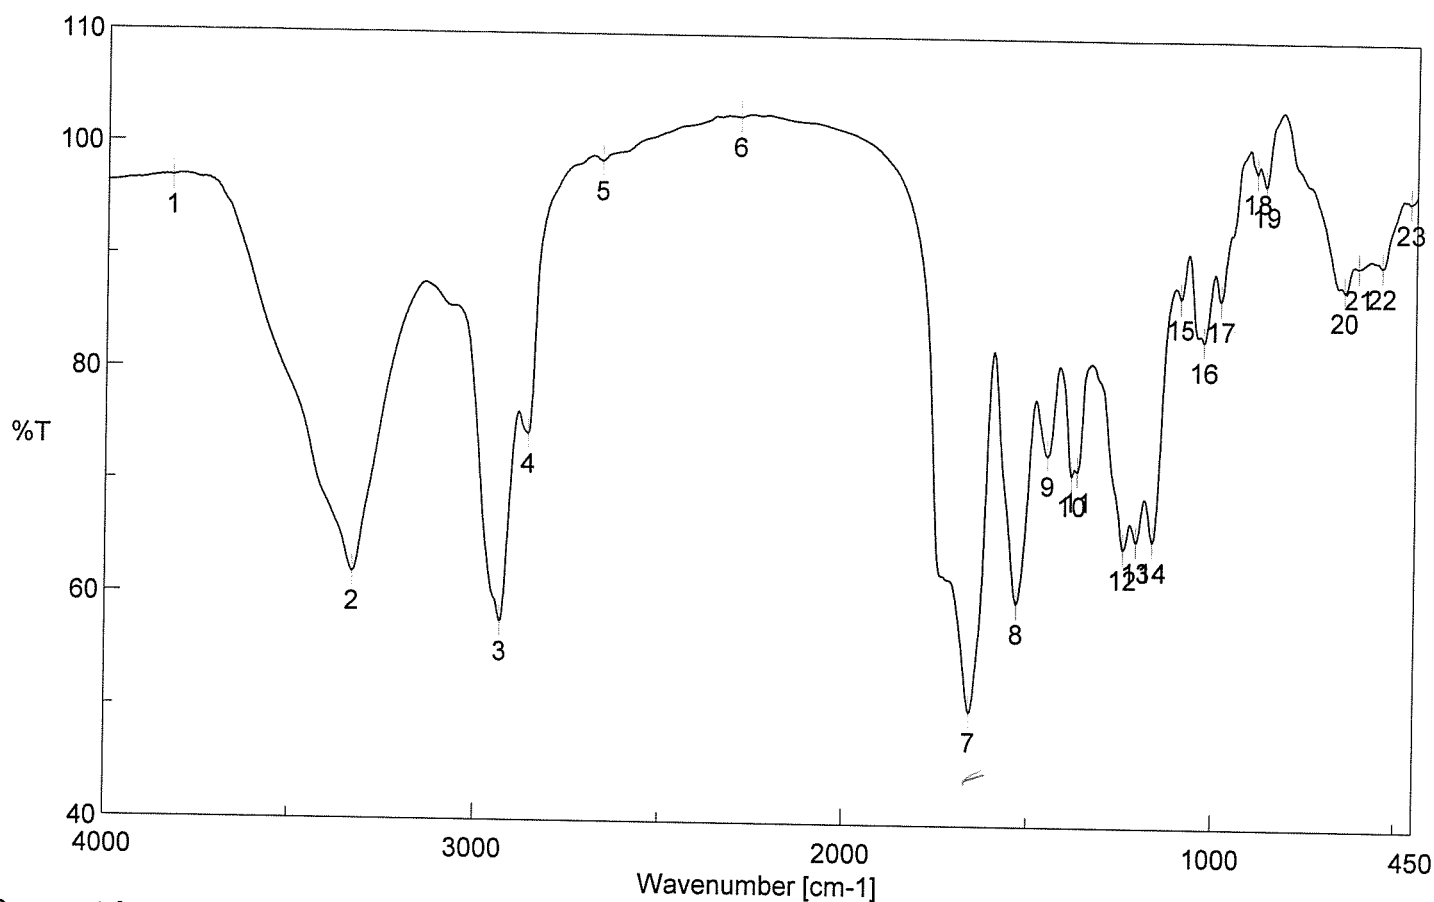

## [Comments]

Sample name SH-2 = 8  
 Comment 24/1/2017  
 User IR  
 Division IR  
 Company MAC

## [ Result of Peak Picking ]

| No.  | Position | Intensity | No. | Position | Intensity | No. | Position | Intensity |
|------|----------|-----------|-----|----------|-----------|-----|----------|-----------|
| 1    | 3824.15  | 96.8742   | ✓ 2 | 3329.5   | 61.9202   | 3   | 2931.27  | 57.5931   |
| 4    | 2858.95  | 74.2732   | 5   | 2663.21  | 98.6153   | 6   | 2290.05  | 102.679   |
| 7    | 1658.48  | 50.1426   | ✓ 8 | 1532.17  | 59.7663   | ✓ 9 | 1452.14  | 72.9331   |
| ✓ 10 | 1386.57  | 71.1753   | 11  | 1372.1   | 71.5332   | 12  | 1246.75  | 64.7238   |
| 13   | 1212.04  | 65.377    | 14  | 1166.72  | 65.4258   | 15  | 1093.44  | 87.0638   |
| 16   | 1027.87  | 83.2525   | 17  | 983.518  | 86.9155   | 18  | 887.095  | 98.3064   |
| 19   | 862.989  | 97.1688   | 20  | 646.036  | 87.8817   | 21  | 606.503  | 89.9889   |
| 22   | 542.863  | 90.097    | 23  | 467.653  | 95.781    |     |          |           |

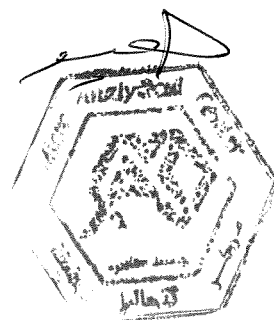

# Cairo University Micro Analytical Center

## DI Analysis Shimadzu Qp-2010 Plus

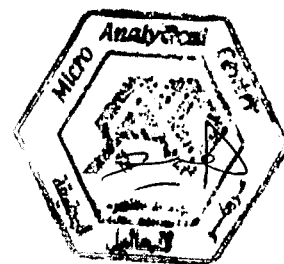

### Sample Information

Analyzed by : Dr. Mai Younis  
 Analyzed : 29/01/2017 10:34:40  
 Sample Name : Sh-2 = 8  
 Sample ID :  
 Customer Name : Dr. Gaber Osman - NRC  
 Data File : C:\GCMSsolution\Data\Project1\Sh-2.QGD  
 Org Data File : C:\GCMSsolution\Data\Project1\Sh-2.QGD  
 Method File : C:\GCMSsolution\Data\Project1\High Temperature Op  
 Org Method File : C:\GCMSsolution\Data\Project1\High Temperature Op  
 Report File :  
 Tuning File : C:\GCMSsolution\System\Tune1\\_default.qgt  
 \$EndIf\$Modified by : Dr. Mai Younis  
 Modified : 29/01/2017 10:41:41

### Method

==== Analytical Line 1 ====  
 IonSourceTemp : 250.00 °C  
 [MS Table]  
 --Group 1 - Event 1--  
 Start Time : 0.00min  
 End Time : 10.00min  
 ACQ Mode : Scan  
 Event Time : 0.50sec  
 Scan Speed : 2500  
 Start m/z : 50.00  
 End m/z : 1090.00

Electron Voltage : 70 eV  
 Ionization Mode : EI

C:\GCMSsolution\Data\Project1\Sh-2.QGD

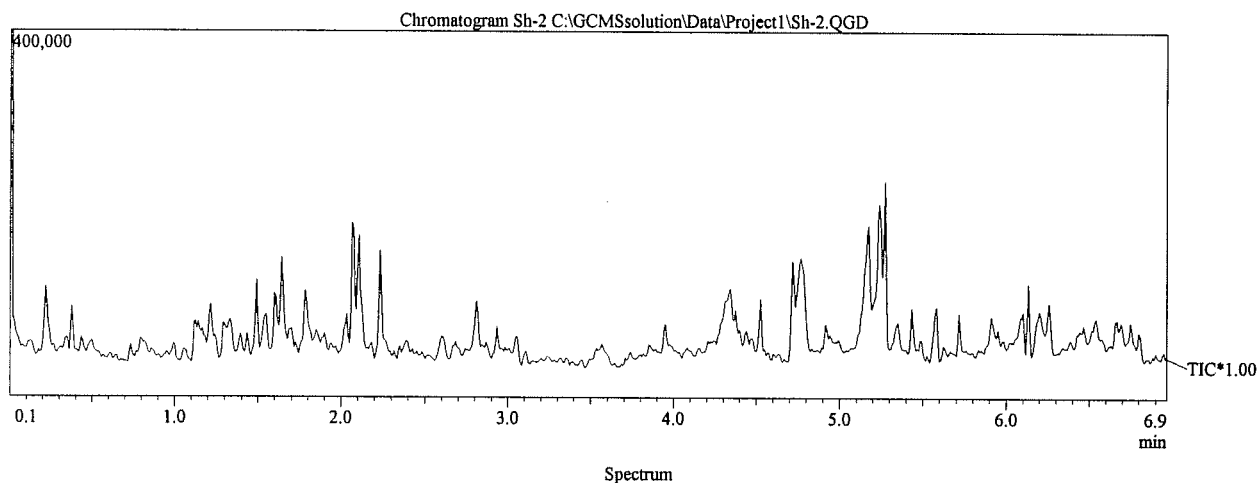

Line#:1 R.Time:5.2(Scan#:626)

MassPeaks:450

RawMode:Single 5.2(626) BasePeak:265(1392)

BG Mode:None Group 1 - Event 1

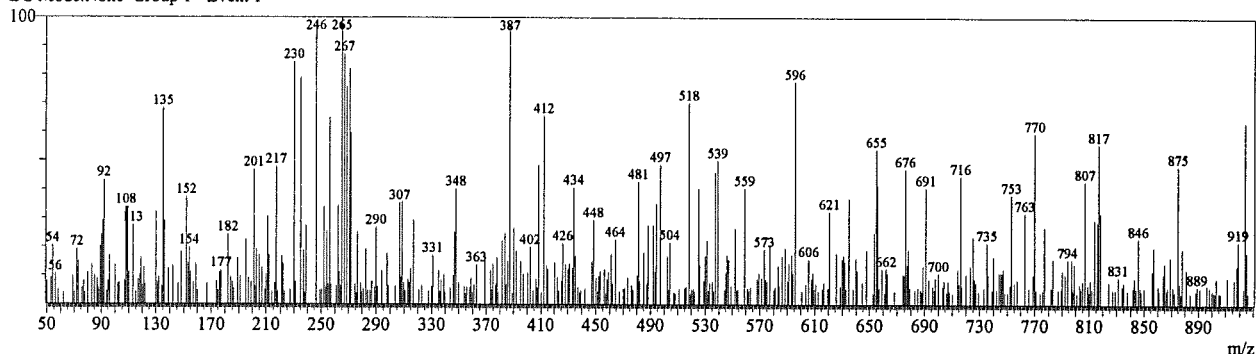

### Mass Table

Line#:1 R.Time:5.2(Scan#:626)

MassPeaks:450

RawMode:Single 5.2(626) BasePeak:265(1392)

BG Mode:None Group 1 - Event 1

| # | m/z   | Abs. In | Rel. Int. | # | m/z   | Abs. In | Rel. Int. | # | m/z   | Abs. In | Rel. Int. |
|---|-------|---------|-----------|---|-------|---------|-----------|---|-------|---------|-----------|
| 1 | 50.00 | 111     | 7.97      | 4 | 56.00 | 146     | 10.49     | 7 | 69.00 | 134     | 9.63      |
| 2 | 53.00 | 130     | 9.34      | 5 | 58.00 | 68      | 4.89      | 8 | 70.00 | 58      | 4.17      |
| 3 | 54.00 | 282     | 20.26     | 6 | 62.00 | 55      | 3.95      | 9 | 72.00 | 266     | 19.11     |

| #  | m/z    | Abs. In | Rel. Int. | #   | m/z    | Abs. In | Rel. Int. | #   | m/z    | Abs. In | Rel. Int. |
|----|--------|---------|-----------|-----|--------|---------|-----------|-----|--------|---------|-----------|
| 10 | 73.00  | 209     | 15.01     | 79  | 211.00 | 428     | 30.75     | 148 | 339.80 | 58      | 4.17      |
| 11 | 76.00  | 79      | 5.68      | 80  | 212.00 | 239     | 17.17     | 149 | 343.80 | 78      | 5.60      |
| 12 | 77.00  | 111     | 7.97      | 81  | 214.00 | 58      | 4.17      | 150 | 345.80 | 137     | 9.84      |
| 13 | 78.00  | 55      | 3.95      | 82  | 216.00 | 102     | 7.33      | 151 | 346.80 | 350     | 25.14     |
| 14 | 80.00  | 151     | 10.85     | 83  | 217.00 | 666     | 47.84     | 152 | 347.80 | 559     | 40.16     |
| 15 | 83.00  | 190     | 13.65     | 84  | 218.00 | 62      | 4.45      | 153 | 349.80 | 102     | 7.33      |
| 16 | 85.00  | 137     | 9.84      | 85  | 221.00 | 231     | 16.59     | 154 | 353.80 | 84      | 6.03      |
| 17 | 87.00  | 122     | 8.76      | 86  | 222.00 | 196     | 14.08     | 155 | 354.80 | 52      | 3.74      |
| 18 | 88.00  | 78      | 5.60      | 87  | 223.00 | 60      | 4.31      | 156 | 355.80 | 82      | 5.89      |
| 19 | 89.00  | 281     | 20.19     | 88  | 227.00 | 71      | 5.10      | 157 | 357.80 | 78      | 5.60      |
| 20 | 90.00  | 338     | 24.28     | 89  | 230.00 | 1175    | 84.41     | 158 | 358.80 | 124     | 8.91      |
| 21 | 91.00  | 407     | 29.24     | 90  | 231.00 | 110     | 7.90      | 159 | 359.80 | 57      | 4.09      |
| 22 | 92.00  | 601     | 43.18     | 91  | 235.00 | 1098    | 78.88     | 160 | 360.80 | 94      | 6.75      |
| 23 | 94.00  | 63      | 4.53      | 92  | 237.00 | 260     | 18.68     | 161 | 362.80 | 190     | 13.65     |
| 24 | 95.00  | 111     | 7.97      | 93  | 238.00 | 57      | 4.09      | 162 | 368.80 | 217     | 15.59     |
| 25 | 96.00  | 236     | 16.95     | 94  | 239.00 | 380     | 27.30     | 163 | 372.80 | 162     | 11.64     |
| 26 | 100.00 | 190     | 13.65     | 95  | 246.25 | 1367    | 98.20     | 164 | 373.80 | 70      | 5.03      |
| 27 | 102.00 | 98      | 7.04      | 96  | 249.20 | 65      | 4.67      | 165 | 374.80 | 194     | 13.94     |
| 28 | 103.00 | 103     | 7.40      | 97  | 250.20 | 71      | 5.10      | 166 | 376.80 | 90      | 6.47      |
| 29 | 107.00 | 114     | 8.19      | 98  | 252.20 | 473     | 33.98     | 167 | 377.80 | 226     | 16.24     |
| 30 | 108.00 | 470     | 33.76     | 99  | 253.20 | 81      | 5.82      | 168 | 378.80 | 58      | 4.17      |
| 31 | 109.00 | 470     | 33.76     | 100 | 254.20 | 354     | 25.43     | 169 | 381.80 | 310     | 22.27     |
| 32 | 110.00 | 154     | 11.06     | 101 | 255.20 | 97      | 6.97      | 170 | 383.80 | 343     | 24.64     |
| 33 | 113.00 | 383     | 27.51     | 102 | 256.20 | 905     | 65.01     | 171 | 384.80 | 97      | 6.97      |
| 34 | 115.00 | 60      | 4.31      | 103 | 257.20 | 95      | 6.82      | 172 | 385.80 | 207     | 14.87     |
| 35 | 117.00 | 119     | 8.55      | 104 | 261.20 | 86      | 6.18      | 173 | 387.20 | 1343    | 96.48     |
| 36 | 118.00 | 140     | 10.06     | 105 | 262.20 | 478     | 34.34     | 174 | 389.20 | 52      | 3.74      |
| 37 | 119.00 | 225     | 16.16     | 106 | 263.20 | 154     | 11.06     | 175 | 390.20 | 369     | 26.51     |
| 38 | 120.00 | 92      | 6.61      | 107 | 264.20 | 90      | 6.47      | 176 | 392.20 | 257     | 18.46     |
| 39 | 121.00 | 177     | 12.72     | 108 | 265.15 | 1392    | 100.00    | 177 | 395.20 | 206     | 14.80     |
| 40 | 122.00 | 95      | 6.82      | 109 | 266.85 | 1212    | 87.07     | 178 | 397.20 | 145     | 10.42     |
| 41 | 130.00 | 449     | 32.26     | 110 | 268.80 | 1054    | 75.72     | 179 | 400.20 | 150     | 10.78     |
| 42 | 131.00 | 106     | 7.61      | 111 | 270.80 | 1142    | 82.04     | 180 | 402.20 | 276     | 19.83     |
| 43 | 132.00 | 130     | 9.34      | 112 | 271.80 | 830     | 59.63     | 181 | 404.20 | 65      | 4.67      |
| 44 | 134.00 | 86      | 6.18      | 113 | 274.80 | 97      | 6.97      | 182 | 406.20 | 122     | 8.76      |
| 45 | 135.00 | 948     | 68.10     | 114 | 275.80 | 54      | 3.88      | 183 | 407.20 | 81      | 5.82      |
| 46 | 136.00 | 404     | 29.02     | 115 | 276.80 | 351     | 25.22     | 184 | 408.20 | 674     | 48.42     |
| 47 | 139.00 | 170     | 12.21     | 116 | 278.80 | 102     | 7.33      | 185 | 410.20 | 55      | 3.95      |
| 48 | 142.00 | 185     | 13.29     | 117 | 279.80 | 58      | 4.17      | 186 | 412.20 | 913     | 65.59     |
| 49 | 146.00 | 100     | 7.18      | 118 | 280.80 | 73      | 5.24      | 187 | 414.20 | 186     | 13.36     |
| 50 | 148.00 | 255     | 18.32     | 119 | 282.80 | 265     | 19.04     | 188 | 415.20 | 167     | 12.00     |
| 51 | 152.00 | 519     | 37.28     | 120 | 283.80 | 66      | 4.74      | 189 | 420.20 | 201     | 14.44     |
| 52 | 153.00 | 199     | 14.30     | 121 | 285.80 | 66      | 4.74      | 190 | 422.20 | 129     | 9.27      |
| 53 | 154.00 | 273     | 19.61     | 122 | 286.80 | 110     | 7.90      | 191 | 423.20 | 66      | 4.74      |
| 54 | 155.00 | 156     | 11.21     | 123 | 288.80 | 82      | 5.89      | 192 | 425.20 | 111     | 7.97      |
| 55 | 157.00 | 105     | 7.54      | 124 | 289.80 | 372     | 26.72     | 193 | 426.20 | 295     | 21.19     |
| 56 | 159.00 | 196     | 14.08     | 125 | 290.80 | 86      | 6.18      | 194 | 428.20 | 191     | 13.72     |
| 57 | 160.00 | 65      | 4.67      | 126 | 293.80 | 161     | 11.57     | 195 | 430.20 | 170     | 12.21     |
| 58 | 167.00 | 100     | 7.18      | 127 | 297.80 | 246     | 17.67     | 196 | 431.20 | 196     | 14.08     |
| 59 | 174.00 | 111     | 7.97      | 128 | 298.80 | 87      | 6.25      | 197 | 433.20 | 175     | 12.57     |
| 60 | 175.00 | 68      | 4.89      | 129 | 303.80 | 86      | 6.18      | 198 | 434.20 | 566     | 40.66     |
| 61 | 176.00 | 153     | 10.99     | 130 | 306.80 | 490     | 35.20     | 199 | 435.20 | 234     | 16.81     |
| 62 | 177.00 | 162     | 11.64     | 131 | 307.80 | 130     | 9.34      | 200 | 437.20 | 81      | 5.82      |
| 63 | 182.00 | 338     | 24.28     | 132 | 308.80 | 497     | 35.70     | 201 | 438.20 | 54      | 3.88      |
| 64 | 184.00 | 132     | 9.48      | 133 | 309.80 | 103     | 7.40      | 202 | 439.20 | 66      | 4.74      |
| 65 | 185.00 | 108     | 7.76      | 134 | 310.80 | 66      | 4.74      | 203 | 442.20 | 73      | 5.24      |
| 66 | 186.00 | 76      | 5.46      | 135 | 312.80 | 119     | 8.55      | 204 | 447.20 | 204     | 14.66     |
| 67 | 189.00 | 222     | 15.95     | 136 | 313.80 | 105     | 7.54      | 205 | 448.20 | 407     | 29.24     |
| 68 | 191.00 | 135     | 9.70      | 137 | 314.80 | 170     | 12.21     | 206 | 450.20 | 127     | 9.12      |
| 69 | 195.00 | 314     | 22.56     | 138 | 316.80 | 407     | 29.24     | 207 | 451.20 | 63      | 4.53      |
| 70 | 197.00 | 127     | 9.12      | 139 | 320.80 | 68      | 4.89      | 208 | 452.20 | 135     | 9.70      |
| 71 | 199.00 | 108     | 7.76      | 140 | 322.80 | 89      | 6.39      | 209 | 453.20 | 158     | 11.35     |
| 72 | 201.00 | 652     | 46.84     | 141 | 327.80 | 63      | 4.53      | 210 | 456.20 | 167     | 12.00     |
| 73 | 202.00 | 87      | 6.25      | 142 | 329.80 | 86      | 6.18      | 211 | 457.20 | 52      | 3.74      |
| 74 | 203.00 | 265     | 19.04     | 143 | 330.80 | 236     | 16.95     | 212 | 458.20 | 118     | 8.48      |
| 75 | 205.00 | 236     | 16.95     | 144 | 334.80 | 161     | 11.57     | 213 | 459.20 | 154     | 11.06     |
| 76 | 207.00 | 175     | 12.57     | 145 | 335.80 | 62      | 4.45      | 214 | 461.20 | 242     | 17.39     |
| 77 | 209.00 | 71      | 5.10      | 146 | 336.80 | 114     | 8.19      | 215 | 462.20 | 100     | 7.18      |
| 78 | 210.00 | 143     | 10.27     | 147 | 338.80 | 142     | 10.20     | 216 | 464.20 | 314     | 22.56     |

| #   | m/z    | Abs. In | Rel. Int. | #   | m/z    | Abs. In | Rel. Int. | #   | m/z    | Abs. In | Rel. Int. |
|-----|--------|---------|-----------|-----|--------|---------|-----------|-----|--------|---------|-----------|
| 217 | 467.20 | 62      | 4.45      | 286 | 595.75 | 1079    | 77.51     | 355 | 735.00 | 298     | 21.41     |
| 218 | 470.20 | 74      | 5.32      | 287 | 600.70 | 62      | 4.45      | 356 | 736.00 | 142     | 10.20     |
| 219 | 471.20 | 76      | 5.46      | 288 | 603.70 | 95      | 6.82      | 357 | 739.00 | 70      | 5.03      |
| 220 | 473.20 | 129     | 9.27      | 289 | 605.70 | 218     | 15.66     | 358 | 740.00 | 230     | 16.52     |
| 221 | 476.20 | 90      | 6.47      | 290 | 607.70 | 122     | 8.76      | 359 | 742.00 | 71      | 5.10      |
| 222 | 477.20 | 71      | 5.10      | 291 | 608.70 | 151     | 10.85     | 360 | 744.00 | 150     | 10.78     |
| 223 | 480.20 | 138     | 9.91      | 292 | 609.70 | 74      | 5.32      | 361 | 745.00 | 151     | 10.85     |
| 224 | 481.20 | 593     | 42.60     | 293 | 610.70 | 97      | 6.97      | 362 | 746.00 | 150     | 10.78     |
| 225 | 482.20 | 113     | 8.12      | 294 | 612.70 | 63      | 4.53      | 363 | 747.00 | 170     | 12.21     |
| 226 | 485.20 | 250     | 17.96     | 295 | 615.70 | 74      | 5.32      | 364 | 748.00 | 57      | 4.09      |
| 227 | 487.20 | 97      | 6.97      | 296 | 616.70 | 105     | 7.54      | 365 | 750.00 | 54      | 3.88      |
| 228 | 488.20 | 382     | 27.44     | 297 | 619.70 | 76      | 5.46      | 366 | 752.00 | 94      | 6.75      |
| 229 | 492.20 | 382     | 27.44     | 298 | 620.70 | 450     | 32.33     | 367 | 753.00 | 529     | 38.00     |
| 230 | 493.20 | 158     | 11.35     | 299 | 625.70 | 249     | 17.89     | 368 | 755.00 | 100     | 7.18      |
| 231 | 494.20 | 489     | 35.13     | 300 | 628.70 | 87      | 6.25      | 369 | 757.00 | 118     | 8.48      |
| 232 | 497.20 | 676     | 48.56     | 301 | 629.70 | 218     | 15.66     | 370 | 763.00 | 442     | 31.75     |
| 233 | 502.20 | 233     | 16.74     | 302 | 630.70 | 236     | 16.95     | 371 | 766.00 | 78      | 5.60      |
| 234 | 503.20 | 71      | 5.10      | 303 | 631.70 | 204     | 14.66     | 372 | 769.00 | 142     | 10.20     |
| 235 | 504.20 | 300     | 21.55     | 304 | 632.70 | 76      | 5.46      | 373 | 770.00 | 828     | 59.48     |
| 236 | 507.20 | 55      | 3.95      | 305 | 634.70 | 513     | 36.85     | 374 | 771.00 | 68      | 4.89      |
| 237 | 508.20 | 52      | 3.74      | 306 | 637.70 | 74      | 5.32      | 375 | 774.00 | 54      | 3.88      |
| 238 | 511.20 | 74      | 5.32      | 307 | 639.70 | 223     | 16.02     | 376 | 776.00 | 65      | 4.67      |
| 239 | 515.20 | 78      | 5.60      | 308 | 640.70 | 162     | 11.64     | 377 | 777.00 | 374     | 26.87     |
| 240 | 516.20 | 84      | 6.03      | 309 | 644.70 | 106     | 7.61      | 378 | 782.00 | 78      | 5.60      |
| 241 | 518.20 | 977     | 70.19     | 310 | 647.70 | 263     | 18.89     | 379 | 783.00 | 218     | 15.66     |
| 242 | 519.20 | 52      | 3.74      | 311 | 652.70 | 52      | 3.74      | 380 | 787.00 | 70      | 5.03      |
| 243 | 520.20 | 71      | 5.10      | 312 | 653.70 | 346     | 24.86     | 381 | 789.00 | 74      | 5.32      |
| 244 | 521.20 | 74      | 5.32      | 313 | 655.00 | 750     | 53.88     | 382 | 790.00 | 162     | 11.64     |
| 245 | 522.20 | 62      | 4.45      | 314 | 656.00 | 577     | 41.45     | 383 | 792.00 | 142     | 10.20     |
| 246 | 525.20 | 561     | 40.30     | 315 | 657.00 | 78      | 5.60      | 384 | 794.00 | 217     | 15.59     |
| 247 | 526.20 | 191     | 13.72     | 316 | 659.00 | 170     | 12.21     | 385 | 797.00 | 217     | 15.59     |
| 248 | 529.20 | 113     | 8.12      | 317 | 661.00 | 55      | 3.95      | 386 | 798.00 | 68      | 4.89      |
| 249 | 530.20 | 234     | 16.81     | 318 | 662.00 | 172     | 12.36     | 387 | 799.00 | 196     | 14.08     |
| 250 | 531.20 | 311     | 22.34     | 319 | 663.00 | 148     | 10.63     | 388 | 801.00 | 52      | 3.74      |
| 251 | 532.20 | 66      | 4.74      | 320 | 668.00 | 62      | 4.45      | 389 | 803.00 | 95      | 6.82      |
| 252 | 533.20 | 102     | 7.33      | 321 | 674.00 | 143     | 10.27     | 390 | 804.00 | 73      | 5.24      |
| 253 | 535.20 | 110     | 7.90      | 322 | 675.00 | 142     | 10.20     | 391 | 805.00 | 111     | 7.97      |
| 254 | 536.20 | 65      | 4.67      | 323 | 676.00 | 654     | 46.98     | 392 | 807.00 | 596     | 42.82     |
| 255 | 537.20 | 639     | 45.91     | 324 | 677.00 | 191     | 13.72     | 393 | 809.00 | 94      | 6.75      |
| 256 | 539.20 | 695     | 49.93     | 325 | 678.00 | 266     | 19.11     | 394 | 810.00 | 60      | 4.31      |
| 257 | 544.20 | 68      | 4.89      | 326 | 679.00 | 79      | 5.68      | 395 | 811.00 | 116     | 8.33      |
| 258 | 545.20 | 150     | 10.78     | 327 | 683.00 | 70      | 5.03      | 396 | 812.00 | 73      | 5.24      |
| 259 | 546.20 | 238     | 17.10     | 328 | 685.00 | 79      | 5.68      | 397 | 814.00 | 410     | 29.45     |
| 260 | 547.20 | 214     | 15.37     | 329 | 687.00 | 71      | 5.10      | 398 | 816.00 | 398     | 28.59     |
| 261 | 549.20 | 86      | 6.18      | 330 | 688.00 | 60      | 4.31      | 399 | 817.00 | 775     | 55.68     |
| 262 | 552.20 | 370     | 26.58     | 331 | 689.00 | 185     | 13.29     | 400 | 818.00 | 442     | 31.75     |
| 263 | 553.20 | 68      | 4.89      | 332 | 691.00 | 564     | 40.52     | 401 | 824.00 | 108     | 7.76      |
| 264 | 554.20 | 71      | 5.10      | 333 | 693.00 | 119     | 8.55      | 402 | 827.00 | 68      | 4.89      |
| 265 | 559.20 | 562     | 40.37     | 334 | 696.00 | 86      | 6.18      | 403 | 829.00 | 71      | 5.10      |
| 266 | 561.20 | 76      | 5.46      | 335 | 697.00 | 68      | 4.89      | 404 | 831.00 | 132     | 9.48      |
| 267 | 562.20 | 66      | 4.74      | 336 | 698.00 | 127     | 9.12      | 405 | 834.00 | 89      | 6.39      |
| 268 | 563.20 | 82      | 5.89      | 337 | 700.00 | 148     | 10.63     | 406 | 835.00 | 105     | 7.54      |
| 269 | 568.20 | 122     | 8.76      | 338 | 703.00 | 86      | 6.18      | 407 | 838.00 | 65      | 4.67      |
| 270 | 569.20 | 150     | 10.78     | 339 | 704.00 | 113     | 8.12      | 408 | 842.00 | 79      | 5.68      |
| 271 | 571.20 | 126     | 9.05      | 340 | 706.00 | 58      | 4.17      | 409 | 843.00 | 126     | 9.05      |
| 272 | 573.20 | 265     | 19.04     | 341 | 707.00 | 113     | 8.12      | 410 | 844.00 | 76      | 5.46      |
| 273 | 574.20 | 118     | 8.48      | 342 | 708.00 | 63      | 4.53      | 411 | 846.00 | 319     | 22.92     |
| 274 | 575.20 | 111     | 7.97      | 343 | 710.00 | 52      | 3.74      | 412 | 847.00 | 78      | 5.60      |
| 275 | 577.20 | 282     | 20.26     | 344 | 714.00 | 169     | 12.14     | 413 | 848.00 | 63      | 4.53      |
| 276 | 580.20 | 71      | 5.10      | 345 | 715.00 | 100     | 7.18      | 414 | 850.00 | 78      | 5.60      |
| 277 | 581.20 | 82      | 5.89      | 346 | 716.00 | 620     | 44.54     | 415 | 856.00 | 161     | 11.57     |
| 278 | 583.20 | 186     | 13.36     | 347 | 717.00 | 87      | 6.25      | 416 | 857.00 | 276     | 19.83     |
| 279 | 584.20 | 89      | 6.39      | 348 | 720.00 | 145     | 10.42     | 417 | 860.00 | 87      | 6.25      |
| 280 | 586.20 | 233     | 16.74     | 349 | 723.00 | 186     | 13.36     | 418 | 861.00 | 65      | 4.67      |
| 281 | 588.20 | 271     | 19.47     | 350 | 725.00 | 327     | 23.49     | 419 | 864.00 | 146     | 10.49     |
| 282 | 590.20 | 113     | 8.12      | 351 | 726.00 | 122     | 8.76      | 420 | 865.00 | 198     | 14.22     |
| 283 | 591.20 | 198     | 14.22     | 352 | 727.00 | 106     | 7.61      | 421 | 866.00 | 68      | 4.89      |
| 284 | 593.20 | 239     | 17.17     | 353 | 729.00 | 60      | 4.31      | 422 | 867.00 | 79      | 5.68      |
| 285 | 594.20 | 148     | 10.63     | 354 | 733.00 | 78      | 5.60      | 423 | 869.00 | 228     | 16.38     |

| #   | m/z    | Abs. In | Rel. Int. | #   | m/z    | Abs. In | Rel. Int. | #   | m/z    | Abs. In | Rel. Int. |
|-----|--------|---------|-----------|-----|--------|---------|-----------|-----|--------|---------|-----------|
| 424 | 871.00 | 84      | 6.03      | 433 | 889.00 | 86      | 6.18      | 442 | 906.00 | 55      | 3.95      |
| 425 | 872.00 | 60      | 4.31      | 434 | 891.00 | 79      | 5.68      | 443 | 911.00 | 129     | 9.27      |
| 426 | 875.00 | 668     | 47.99     | 435 | 896.00 | 92      | 6.61      | 444 | 916.00 | 121     | 8.69      |
| 427 | 876.00 | 102     | 7.33      | 436 | 898.00 | 82      | 5.89      | 445 | 918.00 | 188     | 13.51     |
| 428 | 877.00 | 52      | 3.74      | 437 | 900.00 | 65      | 4.67      | 446 | 919.00 | 305     | 21.91     |
| 429 | 878.00 | 268     | 19.25     | 438 | 901.00 | 58      | 4.17      | 447 | 923.00 | 76      | 5.46      |
| 430 | 881.00 | 167     | 12.00     | 439 | 902.00 | 57      | 4.09      | 448 | 924.00 | 881     | 63.29     |
| 431 | 884.00 | 54      | 3.88      | 440 | 903.00 | 127     | 9.12      | 449 | 925.00 | 252     | 18.10     |
| 432 | 888.00 | 66      | 4.74      | 441 | 905.00 | 57      | 4.09      | 450 | 926.00 | 54      | 3.88      |
